# Supplementary material for: Identification of a Novel Human Papillomavirus by Metagenomic Analysis of Samples from Patients with Febrile Respiratory Illness
Source: PLoS One. 2013 Mar 15;8(3):e58404. doi: 10.1371/journal.pone.0058404 (PMC3600855; doi:10.1371/journal.pone.0058404)
Supplement: Document S1 — Results of the BLASTn analysis of all sequence reads against the Genbank database. (XLSX) [file pone.0058404.s001.xlsx]

## Sheet: Viruses
#id	name	kingdom	rank	total	LIB001	LIB003	LIB007	LIB008	LIB009	LIB010	LIB024	LIB025			DNA metagenome	RNA metagenome
10239	Viruses	Viruses	superkingdom	30259	5787	443	619	0	10907	0	6886	5617			17313	12946
138950	Human enterovirus C	Viruses	species	9926	0	0	0	0	0	0	5932	3994			0	9926
68887	Torque teno virus	Viruses	species	8090	5704	0	0	0	2386	0	0	0			8090	0
432261	Torque teno midi virus	Viruses	species	3722	0	0	0	0	3722	0	0	0			3722	0
147711	Human rhinovirus A	Viruses	species	1531	0	0	0	0	0	0	871	660			0	1531
136966	SEN virus	Viruses	species	1424	0	0	22	0	1402	0	0	0			1424	0
463676	Human rhinovirus C	Viruses	species	589	0	0	0	0	0	0	0	589			0	589
10566	Human papillomavirus	Viruses	species	571	0	0	0	0	571	0	0	0			571	0
12392	Lactobacillus phage mv4	Viruses	species	429	0	0	429	0	0	0	0	0			429	0
393049	Small anellovirus	Viruses	species	254	0	0	0	0	254	0	0	0			254	0
147712	Human rhinovirus B	Viruses	species	245	0	0	0	0	0	0	0	245			0	245
169066	Human rhinovirus sp.	Viruses	species	202	0	0	0	0	0	0	73	129			0	202
742920	Cyclovirus Chimp11	Viruses	species	168	0	0	168	0	0	0	0	0			168	0
334207	Human papillomavirus 49	Viruses	species	76	76	0	0	0	0	0	0	0			76	0
93678	TTV-like mini virus	Viruses	species	67	7	0	0	0	60	0	0	0			67	0
687373	Torque teno mini virus 5	Viruses	species	32	0	0	0	0	32	0	0	0			32	0
646413	Streptococcus phage 5093	Viruses	species	5	0	0	0	0	5	0	0	0	6876	5617	5	0
464095	Picornavirales	Viruses	order	12503	0	0	0	0	0	0	6886	5617			0	12503
28883	Caudovirales	Viruses	order	5	0	0	0	0	5	0	0	0			5	0
29258	ssDNA viruses	Viruses	no rank	16232	5711	0	190	0	10331	0	0	0			16232	0
363628	unclassified Anelloviridae	Viruses	no rank	13557	5711	0	22	0	7824	0	0	0			13557	0
35278	ssRNA positive-strand viruses, no DNA stage	Viruses	no rank	12503	0	0	0	0	0	0	6886	5617			0	12503
439488	ssRNA viruses	Viruses	no rank	12503	0	0	0	0	0	0	6886	5617			0	12503
861519	Human enterovirus 109	Viruses	no rank	9910	0	0	0	0	0	0	5932	3978			0	9910
443974	TT virus sle	Viruses	no rank	2084	1865	0	0	0	219	0	0	0			2084	0
443975	TT virus sle1957	Viruses	no rank	1865	1865	0	0	0	0	0	0	0			1865	0
167758	TTV-like virus DXL1	Viruses	no rank	1615	0	0	0	0	1615	0	0	0			1615	0
35237	dsDNA viruses, no RNA stage	Viruses	no rank	1095	76	443	0	0	576	0	0	0			652	443
185928	Human rhinovirus 73	Viruses	no rank	891	0	0	0	0	0	0	281	610			0	891
173087	Human papillomavirus types	Viruses	no rank	571	0	0	0	0	571	0	0	0			571	0
333774	unclassified Papillomaviridae	Viruses	no rank	571	0	0	0	0	571	0	0	0			571	0
12333	unclassified phages	Viruses	no rank	429	0	0	429	0	0	0	0	0			429	0
185946	Human rhinovirus 100	Viruses	no rank	347	0	0	0	0	0	0	342	5			0	347
44131	Human rhinovirus 49	Viruses	no rank	242	0	0	0	0	0	0	242	0			0	242
444020	TT virus sle2143	Viruses	no rank	219	0	0	0	0	219	0	0	0			219	0
348531	unclassified Rhinovirus	Viruses	no rank	202	0	0	0	0	0	0	73	129			0	202
642248	unclassified Circoviridae	Viruses	no rank	168	0	0	168	0	0	0	0	0			168	0
742914	suggested genus Cyclovirus	Viruses	no rank	168	0	0	168	0	0	0	0	0			168	0
167325	Human rhinovirus 91	Viruses	no rank	137	0	0	0	0	0	0	0	137			0	137
10616	Human papillomavirus type 49	Viruses	no rank	76	76	0	0	0	0	0	0	0			76	0
167324	Human rhinovirus 46	Viruses	no rank	45	0	0	0	0	0	0	0	45			0	45
42770	Human coxsackievirus A11	Viruses	no rank	16	0	0	0	0	0	0	0	16			0	16
44136	Human rhinovirus 7	Viruses	no rank	6	0	0	0	0	0	0	6	0			0	6
196894	unclassified Siphoviridae	Viruses	no rank	5	0	0	0	0	5	0	0	0			5	0
12059	Enterovirus	Viruses	genus	12503	0	0	0	0	0	0	6886	5617			0	12503
333922	Betapapillomavirus	Viruses	genus	76	76	0	0	0	0	0	0	0			76	0
687332	Betatorquevirus	Viruses	genus	32	0	0	0	0	32	0	0	0			32	0
687329	Anelloviridae	Viruses	family	16064	5711	0	22	0	10331	0	0	0			16064	0
12058	Picornaviridae	Viruses	family	12503	0	0	0	0	0	0	6886	5617			0	12503
151340	Papillomaviridae	Viruses	family	1090	76	443	0	0	571	0	0	0			647	443
39724	Circoviridae	Viruses	family	168	0	0	168	0	0	0	0	0			168	0
10699	Siphoviridae	Viruses	family	5	0	0	0	0	5	0	0	0			5	0

## Sheet: Bacteria
#id	name	kingdom	rank	total	LIB001	LIB003	LIB007	LIB008	LIB009	LIB010	LIB024	LIB025
2	Bacteria	Bacteria	superkingdom	120801	8840	5778	14790	24933	4992	15867	17292	28309
1224	Proteobacteria	Bacteria	phylum	54469	3535	2294	11435	7190	3418	7443	8141	11013
1239	Firmicutes	Bacteria	phylum	30460	4236	2198	1091	12309	7	5601	1385	3633
91061	Bacilli	Bacteria	class	29911	4236	2198	1091	12304	7	5601	1206	3268
1236	Gammaproteobacteria	Bacteria	class	25197	2564	642	2429	6249	3336	1623	3443	4911
186826	Lactobacillales	Bacteria	order	15893	239	2168	20	4379	7	5397	923	2760
28216	Betaproteobacteria	Bacteria	class	15790	706	858	1321	767	72	4405	4061	3600
1385	Bacillales	Bacteria	order	13929	3997	30	1071	7925	0	204	194	508
33958	Lactobacillaceae	Bacteria	family	11404	239	2161	20	3578	0	5397	0	9
1584	Lactobacillus delbrueckii	Bacteria	species	11395	239	2161	20	3578	0	5397	0	0
1578	Lactobacillus	Bacteria	genus	11395	239	2161	20	3578	0	5397	0	0
91347	Enterobacteriales	Bacteria	order	9949	1786	268	1377	3142	3336	6	34	0
543	Enterobacteriaceae	Bacteria	family	9949	1786	268	1377	3142	3336	6	34	0
68525	delta/epsilon subdivisions	Bacteria	subphylum	9276	0	0	7625	5	0	0	560	1086
29547	Epsilonproteobacteria	Bacteria	class	9271	0	0	7625	0	0	0	560	1086
213849	Campylobacterales	Bacteria	order	9262	0	0	7625	0	0	0	560	1077
194	Campylobacter	Bacteria	genus	9262	0	0	7625	0	0	0	560	1077
72294	Campylobacteraceae	Bacteria	family	9262	0	0	7625	0	0	0	560	1077
201174	Actinobacteria	Bacteria	phylum	9041	104	473	1255	121	1567	2171	1035	2315
1760	Actinobacteria (class)	Bacteria	class	9041	104	473	1255	121	1567	2171	1035	2315
85003	Actinobacteridae	Bacteria	subclass	9029	104	473	1243	121	1567	2171	1035	2315
2037	Actinomycetales	Bacteria	order	9029	104	473	1243	121	1567	2171	1035	2315
80840	Burkholderiales	Bacteria	order	8182	660	858	1321	761	72	4258	57	195
199	Campylobacter concisus	Bacteria	species	8091	0	0	7625	0	0	0	130	336
360104	Campylobacter concisus 13826	Bacteria	no rank	7737	0	0	7625	0	0	0	22	90
1585	Lactobacillus delbrueckii subsp. bulgaricus	Bacteria	subspecies	7627	231	2121	20	3146	0	2109	0	0
206351	Neisseriales	Bacteria	order	7394	0	0	0	6	0	0	4004	3384
481	Neisseriaceae	Bacteria	family	7394	0	0	0	6	0	0	4004	3384
186817	Bacillaceae	Bacteria	family	7330	3964	10	1030	2231	0	0	35	60
1386	Bacillus	Bacteria	genus	7321	3964	10	1030	2231	0	0	35	51
482	Neisseria	Bacteria	genus	7100	0	0	0	0	0	0	3753	3347
85006	Micrococcineae	Bacteria	suborder	6889	97	409	1234	121	1567	1838	260	1363
68336	Bacteroidetes/Chlorobi group	Bacteria	superphylum	6747	281	246	974	4460	0	550	121	115
976	Bacteroidetes	Bacteria	phylum	6697	281	246	974	4460	0	550	109	77
135625	Pasteurellales	Bacteria	order	6558	3	0	0	59	0	0	2813	3683
712	Pasteurellaceae	Bacteria	family	6558	3	0	0	59	0	0	2813	3683
90964	Staphylococcaceae	Bacteria	family	6234	33	20	41	5380	0	204	159	397
1279	Staphylococcus	Bacteria	genus	6076	33	20	41	5380	0	204	102	296
119060	Burkholderiaceae	Bacteria	family	5830	660	646	127	526	66	3593	52	160
86661	Bacillus cereus group	Bacteria	species group	5807	3345	7	1025	1424	0	0	0	6
487	Neisseria meningitidis	Bacteria	species	5440	0	0	0	0	0	0	3062	2378
1396	Bacillus cereus	Bacteria	species	5217	3273	7	832	1105	0	0	0	0
72274	Pseudomonadales	Bacteria	order	5161	775	370	25	813	0	1617	596	965
1268	Micrococcaceae	Bacteria	family	5055	97	218	1234	121	1567	267	260	1291
48479	environmental samples	Bacteria	no rank	4884	0	359	0	0	0	0	2081	2444
48736	Ralstonia	Bacteria	genus	4609	503	580	116	26	0	3355	29	0
77133	uncultured bacterium	Bacteria	species	4448	0	0	0	0	0	0	2081	2367
200666	Sphingobacteriales	Bacteria	order	4415	53	17	694	3611	0	32	0	8
117747	Sphingobacteria	Bacteria	class	4415	53	17	694	3611	0	32	0	8
767455	Lactobacillus delbrueckii subsp. bulgaricus ND02	Bacteria	no rank	4390	219	1513	20	2087	0	551	0	0
79329	Chitinophaga pinensis	Bacteria	species	4213	37	9	591	3576	0	0	0	0
485918	Chitinophaga pinensis DSM 2588	Bacteria	no rank	4213	37	9	591	3576	0	0	0	0
563835	Chitinophagaceae	Bacteria	no rank	4213	37	9	591	3576	0	0	0	0
79328	Chitinophaga	Bacteria	genus	4213	37	9	591	3576	0	0	0	0
28211	Alphaproteobacteria	Bacteria	class	4206	265	794	60	169	10	1415	77	1416
620	Shigella	Bacteria	genus	4097	929	13	13	3142	0	0	0	0
623	Shigella flexneri	Bacteria	species	4084	929	0	13	3142	0	0	0	0
329	Ralstonia pickettii	Bacteria	species	4027	337	341	0	26	0	3323	0	0
468	Moraxellaceae	Bacteria	family	4020	427	0	25	813	0	1264	596	895
724	Haemophilus	Bacteria	genus	4000	0	0	0	0	0	0	1320	2680
1270	Micrococcus luteus	Bacteria	species	3467	97	218	1234	78	1567	267	0	6
1269	Micrococcus	Bacteria	genus	3467	97	218	1234	78	1567	267	0	6
29397	Lactobacillus delbrueckii subsp. lactis	Bacteria	subspecies	3326	8	0	0	30	0	3288	0	0
562	Escherichia coli	Bacteria	species	3301	720	0	1263	0	1318	0	0	0
561	Escherichia	Bacteria	genus	3301	720	0	1263	0	1318	0	0	0
402626	Ralstonia pickettii 12J	Bacteria	no rank	3154	74	164	0	0	0	2916	0	0
356	Rhizobiales	Bacteria	order	3022	109	518	51	148	10	1393	37	756
1300	Streptococcaceae	Bacteria	family	2779	0	7	0	0	7	0	583	2182
1301	Streptococcus	Bacteria	genus	2578	0	7	0	0	7	0	583	1981
28035	Staphylococcus lugdunensis	Bacteria	species	2546	0	0	0	2538	0	0	0	8
118969	Legionellales	Bacteria	order	2147	0	0	0	2147	0	0	0	0
80864	Comamonadaceae	Bacteria	family	2090	0	171	1194	19	6	665	0	35
613	Serratia	Bacteria	genus	2062	0	21	0	0	2018	0	23	0
727	Haemophilus influenzae	Bacteria	species	2058	0	0	0	0	0	0	660	1398
615	Serratia marcescens	Bacteria	species	2041	0	0	0	0	2018	0	23	0
446	Legionella pneumophila	Bacteria	species	1973	0	0	0	1973	0	0	0	0
297246	Legionella pneumophila str. Paris	Bacteria	no rank	1973	0	0	0	1973	0	0	0	0
445	Legionella	Bacteria	genus	1973	0	0	0	1973	0	0	0	0
444	Legionellaceae	Bacteria	family	1973	0	0	0	1973	0	0	0	0
1280	Staphylococcus aureus	Bacteria	species	1910	18	0	0	1691	0	201	0	0
909768	Acinetobacter calcoaceticus/baumannii complex	Bacteria	species group	1795	0	0	0	533	0	1235	0	27
469	Acinetobacter	Bacteria	genus	1795	0	0	0	533	0	1235	0	27
85023	Microbacteriaceae	Bacteria	family	1794	0	191	0	0	0	1571	0	32
470	Acinetobacter baumannii	Bacteria	species	1768	0	0	0	533	0	1235	0	0
407	Methylobacterium	Bacteria	genus	1729	48	0	0	129	0	1112	0	440
119045	Methylobacteriaceae	Bacteria	family	1729	48	0	0	129	0	1112	0	440
2033	Microbacterium testaceum	Bacteria	species	1562	0	0	0	0	0	1562	0	0
979556	Microbacterium testaceum StLB037	Bacteria	no rank	1562	0	0	0	0	0	1562	0	0
33882	Microbacterium	Bacteria	genus	1562	0	0	0	0	0	1562	0	0
32207	Rothia	Bacteria	genus	1545	0	0	0	0	0	0	260	1285
729	Haemophilus parainfluenzae	Bacteria	species	1512	0	0	0	0	0	0	434	1078
862965	Haemophilus parainfluenzae T3T1	Bacteria	no rank	1512	0	0	0	0	0	0	434	1078
475	Moraxella	Bacteria	genus	1442	0	0	0	12	0	0	585	845
1408	Bacillus pumilus	Bacteria	species	1434	619	3	5	807	0	0	0	0
12916	Acidovorax	Bacteria	genus	1279	0	0	1194	12	6	32	0	35
80869	Acidovorax citrulli	Bacteria	species	1194	0	0	1194	0	0	0	0	0
397945	Acidovorax citrulli AAC00-1	Bacteria	no rank	1194	0	0	1194	0	0	0	0	0
1282	Staphylococcus epidermidis	Bacteria	species	1186	15	20	0	1151	0	0	0	0
286	Pseudomonas	Bacteria	genus	1141	348	370	0	0	0	353	0	70
135621	Pseudomonadaceae	Bacteria	family	1141	348	370	0	0	0	353	0	70
713	Actinobacillus	Bacteria	genus	1067	0	0	0	0	0	0	457	610
223967	Methylobacterium populi	Bacteria	species	1041	0	0	0	0	0	986	0	55
441620	Methylobacterium populi BJ001	Bacteria	no rank	1041	0	0	0	0	0	986	0	55
32008	Burkholderia	Bacteria	genus	1029	148	66	11	500	66	238	0	0
46226	Branhamella	Bacteria	subgenus	1024	0	0	0	0	0	0	302	722
480	Moraxella catarrhalis	Bacteria	species	1024	0	0	0	0	0	0	302	722
87882	Burkholderia cepacia complex	Bacteria	species group	1014	141	58	11	500	66	238	0	0
292	Burkholderia cepacia	Bacteria	species	1014	141	58	11	500	66	238	0	0
43675	Rothia mucilaginosa	Bacteria	species	1010	0	0	0	0	0	0	156	854
680646	Rothia mucilaginosa DY-18	Bacteria	no rank	1010	0	0	0	0	0	0	156	854
135622	Alteromonadales	Bacteria	order	1008	0	4	977	27	0	0	0	0
591020	Shigella flexneri 2002017	Bacteria	no rank	919	919	0	0	0	0	0	0	0
315750	Bacillus pumilus SAFR-032	Bacteria	no rank	914	619	3	5	287	0	0	0	0
117743	Flavobacteria	Bacteria	class	910	211	54	177	34	0	349	44	41
200644	Flavobacteriales	Bacteria	order	891	211	54	170	34	0	349	44	29
85007	Corynebacterineae	Bacteria	suborder	883	2	26	9	0	0	78	566	202
204457	Sphingomonadales	Bacteria	order	812	156	276	0	21	0	22	6	331
32066	Fusobacteria	Bacteria	phylum	806	0	0	0	0	0	0	652	154
203491	Fusobacteriales	Bacteria	order	806	0	0	0	0	0	0	652	154
203492	Fusobacteriaceae	Bacteria	family	806	0	0	0	0	0	0	652	154
203490	Fusobacteria (class)	Bacteria	class	806	0	0	0	0	0	0	652	154
34073	Variovorax paradoxus	Bacteria	species	788	0	155	0	0	0	633	0	0
34072	Variovorax	Bacteria	genus	788	0	155	0	0	0	633	0	0
81852	Enterococcaceae	Bacteria	family	788	0	0	0	0	0	0	314	474
497	Psychrobacter	Bacteria	genus	783	427	0	25	268	0	29	11	23
49546	Flavobacteriaceae	Bacteria	family	781	205	46	74	34	0	349	44	29
1350	Enterococcus	Bacteria	genus	764	0	0	0	0	0	0	314	450
749219	Moraxella catarrhalis RH4	Bacteria	no rank	761	0	0	0	0	0	0	302	459
848	Fusobacterium	Bacteria	genus	740	0	0	0	0	0	0	586	154
715	Actinobacillus pleuropneumoniae	Bacteria	species	725	0	0	0	0	0	0	457	268
1716	Corynebacterium	Bacteria	genus	717	0	0	0	0	0	0	525	192
1653	Corynebacteriaceae	Bacteria	family	717	0	0	0	0	0	0	525	192
119603	Streptococcus dysgalactiae group	Bacteria	species group	696	0	0	0	0	0	0	115	581
136841	Pseudomonas aeruginosa group	Bacteria	species group	689	325	364	0	0	0	0	0	0
287	Pseudomonas aeruginosa	Bacteria	species	689	325	364	0	0	0	0	0	0
53246	Pseudoalteromonas	Bacteria	genus	662	0	0	655	7	0	0	0	0
267888	Pseudoalteromonadaceae	Bacteria	family	662	0	0	655	7	0	0	0	0
234831	Pseudoalteromonas sp. SM9913	Bacteria	species	655	0	0	655	0	0	0	0	0
428406	Ralstonia pickettii 12D	Bacteria	no rank	643	87	123	0	26	0	407	0	0
595537	Variovorax paradoxus EPS	Bacteria	no rank	633	0	0	0	0	0	633	0	0
85005	Actinomycineae	Bacteria	suborder	624	0	0	0	0	0	0	124	500
2049	Actinomycetaceae	Bacteria	family	624	0	0	0	0	0	0	124	500
41297	Sphingomonadaceae	Bacteria	family	611	156	276	0	21	0	22	6	130
935599	Neisseria meningitidis G2136	Bacteria	no rank	581	0	0	0	0	0	0	0	581
69277	Phyllobacteriaceae	Bacteria	family	565	55	197	51	19	0	157	0	86
305	Ralstonia solanacearum	Bacteria	species	553	166	239	116	0	0	32	0	0
1428	Bacillus thuringiensis	Bacteria	species	552	50	0	193	303	0	0	0	6
68287	Mesorhizobium	Bacteria	genus	546	55	187	51	10	0	157	0	86
859	Fusobacterium necrophorum	Bacteria	species	538	0	0	0	0	0	0	486	52
509173	Acinetobacter baumannii AYE	Bacteria	no rank	533	0	0	0	533	0	0	0	0
541229	Bacillus thuringiensis serovar chinensis CT-43	Bacteria	no rank	532	36	0	193	303	0	0	0	0
1001229	Bacillus thuringiensis serovar chinensis	Bacteria	no rank	532	36	0	193	303	0	0	0	0
169292	Corynebacterium aurimucosum	Bacteria	species	507	0	0	0	0	0	0	401	106
548476	Corynebacterium aurimucosum ATCC 700975	Bacteria	no rank	507	0	0	0	0	0	0	401	106
909929	Selenomonadales	Bacteria	order	501	0	0	0	0	0	0	151	350
31977	Veillonellaceae	Bacteria	family	501	0	0	0	0	0	0	151	350
909932	Negativicutes	Bacteria	class	501	0	0	0	0	0	0	151	350
2047	Rothia dentocariosa	Bacteria	species	474	0	0	0	0	0	0	43	431
762948	Rothia dentocariosa ATCC 17931	Bacteria	no rank	474	0	0	0	0	0	0	43	431
1654	Actinomyces	Bacteria	genus	459	0	0	0	0	0	0	94	365
1117	Cyanobacteria	Bacteria	phylum	443	0	0	17	420	0	0	0	6
44008	Enterococcus cecorum	Bacteria	species	441	0	0	0	0	0	0	195	246
416916	Aggregatibacter	Bacteria	genus	440	3	0	0	0	0	0	405	32
330922	Psychrobacter cryohalolentis	Bacteria	species	432	427	0	5	0	0	0	0	0
335284	Psychrobacter cryohalolentis K5	Bacteria	no rank	432	427	0	5	0	0	0	0	0
768507	Cytophagales	Bacteria	order	426	6	175	19	57	0	169	0	0
768503	Cytophagia	Bacteria	class	426	6	175	19	57	0	169	0	0
1161	Nostocales	Bacteria	order	425	0	0	5	420	0	0	0	0
1162	Nostocaceae	Bacteria	family	425	0	0	5	420	0	0	0	0
119602	Streptococcus dysgalactiae subsp. equisimilis	Bacteria	subspecies	404	0	0	0	0	0	0	40	364
1334	Streptococcus dysgalactiae	Bacteria	species	404	0	0	0	0	0	0	40	364
486410	Streptococcus dysgalactiae subsp. equisimilis GGS_124	Bacteria	no rank	404	0	0	0	0	0	0	40	364
89373	Cytophagaceae	Bacteria	family	404	0	175	8	57	0	164	0	0
1313	Streptococcus pneumoniae	Bacteria	species	389	0	0	0	0	0	0	24	365
237	Flavobacterium	Bacteria	genus	368	16	3	0	0	0	349	0	0
325464	uncultured bacterium zdt-25h12	Bacteria	species	359	0	359	0	0	0	0	0	0
986	Flavobacterium johnsoniae	Bacteria	species	354	2	3	0	0	0	349	0	0
376686	Flavobacterium johnsoniae UW101	Bacteria	no rank	354	2	3	0	0	0	349	0	0
136843	Pseudomonas fluorescens group	Bacteria	species group	353	0	0	0	0	0	353	0	0
294	Pseudomonas fluorescens	Bacteria	species	353	0	0	0	0	0	353	0	0
29466	Veillonella parvula	Bacteria	species	353	0	0	0	0	0	0	142	211
216595	Pseudomonas fluorescens SBW25	Bacteria	no rank	353	0	0	0	0	0	353	0	0
479436	Veillonella parvula DSM 2008	Bacteria	no rank	353	0	0	0	0	0	0	142	211
29465	Veillonella	Bacteria	genus	353	0	0	0	0	0	0	142	211
22	Shewanella	Bacteria	genus	346	0	4	322	20	0	0	0	0
267890	Shewanellaceae	Bacteria	family	346	0	4	322	20	0	0	0	0
486	Neisseria lactamica	Bacteria	species	340	0	0	0	0	0	0	41	299
489653	Neisseria lactamica 020-06	Bacteria	no rank	340	0	0	0	0	0	0	41	299
31998	Methylobacterium radiotolerans	Bacteria	species	328	48	0	0	0	0	64	0	216
426355	Methylobacterium radiotolerans JCM 2831	Bacteria	no rank	328	48	0	0	0	0	64	0	216
353496	Lactobacillus delbrueckii subsp. bulgaricus 2038	Bacteria	no rank	325	0	0	0	0	0	325	0	0
60481	Shewanella sp. MR-7	Bacteria	species	322	0	0	322	0	0	0	0	0
143388	Fusobacterium necrophorum subsp. necrophorum	Bacteria	subspecies	319	0	0	0	0	0	0	280	39
381	Mesorhizobium loti	Bacteria	species	313	55	0	15	0	0	157	0	86
204	Campylobacter showae	Bacteria	species	302	0	0	0	0	0	0	302	0
349106	Psychrobacter sp. PRwf-1	Bacteria	species	297	0	0	0	268	0	29	0	0
1336	Streptococcus equi	Bacteria	species	292	0	0	0	0	0	0	75	217
204458	Caulobacterales	Bacteria	order	259	0	0	0	0	0	0	29	230
75	Caulobacter	Bacteria	genus	259	0	0	0	0	0	0	29	230
76892	Caulobacteraceae	Bacteria	family	259	0	0	0	0	0	0	29	230
135720	Neisseria meningitidis serogroup C	Bacteria	no rank	258	0	0	0	0	0	0	237	21
374833	Neisseria meningitidis 053442	Bacteria	no rank	258	0	0	0	0	0	0	237	21
117207	Sphingopyxis alaskensis	Bacteria	species	247	152	65	0	0	0	0	0	30
317655	Sphingopyxis alaskensis RB2256	Bacteria	no rank	247	152	65	0	0	0	0	0	30
165697	Sphingopyxis	Bacteria	genus	247	152	65	0	0	0	0	0	30
39645	Mesorhizobium ciceri	Bacteria	species	233	0	187	36	10	0	0	0	0
267608	Ralstonia solanacearum GMI1000	Bacteria	no rank	233	0	233	0	0	0	0	0	0
278148	Mesorhizobium ciceri biovar biserrulae	Bacteria	no rank	233	0	187	36	10	0	0	0	0
765698	Mesorhizobium ciceri biovar biserrulae WSM1271	Bacteria	no rank	233	0	187	36	10	0	0	0	0
266835	Mesorhizobium loti MAFF303099	Bacteria	no rank	227	55	0	15	0	0	157	0	0
622452	Kineosporiineae	Bacteria	suborder	224	0	0	0	0	0	0	0	224
131568	Kineococcus radiotolerans	Bacteria	species	224	0	0	0	0	0	0	0	224
266940	Kineococcus radiotolerans SRS30216	Bacteria	no rank	224	0	0	0	0	0	0	0	224
33981	Kineococcus	Bacteria	genus	224	0	0	0	0	0	0	0	224
83778	Kineosporiaceae	Bacteria	family	224	0	0	0	0	0	0	0	224
218934	uncultured Campylobacter sp.	Bacteria	species	222	0	0	0	0	0	0	99	123
134209	environmental samples	Bacteria	no rank	222	0	0	0	0	0	0	99	123
506	Alcaligenaceae	Bacteria	family	221	0	0	0	216	0	0	5	0
160791	Sphingomonas wittichii	Bacteria	species	218	0	167	0	21	0	22	0	8
392499	Sphingomonas wittichii RW1	Bacteria	no rank	218	0	167	0	21	0	22	0	8
13687	Sphingomonas	Bacteria	genus	218	0	167	0	21	0	22	0	8
46225	Moraxella	Bacteria	subgenus	213	0	0	0	12	0	0	183	18
1007105	Pusillimonas sp. T7-7	Bacteria	species	212	0	0	0	212	0	0	0	0
305976	Pusillimonas	Bacteria	genus	212	0	0	0	212	0	0	0	0
41294	Bradyrhizobiaceae	Bacteria	family	210	6	117	0	0	10	0	0	77
59736	Leifsonia xyli subsp. xyli	Bacteria	subspecies	200	0	191	0	0	0	9	0	0
1575	Leifsonia xyli	Bacteria	species	200	0	191	0	0	0	9	0	0
281090	Leifsonia xyli subsp. xyli str. CTCB07	Bacteria	no rank	200	0	191	0	0	0	9	0	0
110932	Leifsonia	Bacteria	genus	200	0	191	0	0	0	9	0	0
738	Haemophilus parasuis	Bacteria	species	195	0	0	0	0	0	0	44	151
1660	Actinomyces odontolyticus	Bacteria	species	194	0	0	0	0	0	0	35	159
732	Aggregatibacter aphrophilus	Bacteria	species	192	0	0	0	0	0	0	192	0
634176	Aggregatibacter aphrophilus NJ8700	Bacteria	no rank	192	0	0	0	0	0	0	192	0
578822	Methylobacterium extorquens group	Bacteria	species group	191	0	0	0	129	0	62	0	0
408	Methylobacterium extorquens	Bacteria	species	191	0	0	0	129	0	62	0	0
94254	Dyadobacter fermentans	Bacteria	species	183	0	175	8	0	0	0	0	0
386891	Moraxella bovoculi	Bacteria	species	183	0	0	0	0	0	0	183	0
471854	Dyadobacter fermentans DSM 18053	Bacteria	no rank	183	0	175	8	0	0	0	0	0
743974	Moraxella bovoculi 237	Bacteria	no rank	183	0	0	0	0	0	0	183	0
120831	Dyadobacter	Bacteria	genus	183	0	175	8	0	0	0	0	0
171549	Bacteroidales	Bacteria	order	182	0	0	14	94	0	0	46	28
200643	Bacteroidia	Bacteria	class	182	0	0	14	94	0	0	46	28
335929	Erythrobacteraceae	Bacteria	family	178	0	0	0	0	0	0	0	178
777	Coxiella burnetii	Bacteria	species	174	0	0	0	174	0	0	0	0
776	Coxiella	Bacteria	genus	174	0	0	0	174	0	0	0	0
118968	Coxiellaceae	Bacteria	family	174	0	0	0	174	0	0	0	0
106589	Cupriavidus	Bacteria	genus	172	9	0	0	0	0	0	3	160
108	Spirosoma linguale	Bacteria	species	164	0	0	0	0	0	164	0	0
504472	Spirosoma linguale DSM 74	Bacteria	no rank	164	0	0	0	0	0	164	0	0
107	Spirosoma	Bacteria	genus	164	0	0	0	0	0	164	0	0
69966	Macrococcus caseolyticus	Bacteria	species	158	0	0	0	0	0	0	57	101
458233	Macrococcus caseolyticus JCSC5402	Bacteria	no rank	158	0	0	0	0	0	0	57	101
69965	Macrococcus	Bacteria	genus	158	0	0	0	0	0	0	57	101
147452	Staphylococcus saprophyticus subsp. saprophyticus	Bacteria	subspecies	149	0	0	0	0	0	0	0	149
29385	Staphylococcus saprophyticus	Bacteria	species	149	0	0	0	0	0	0	0	149
342451	Staphylococcus saprophyticus subsp. saprophyticus ATCC 15305	Bacteria	no rank	149	0	0	0	0	0	0	0	149
69823	Selenomonas sputigena	Bacteria	species	148	0	0	0	0	0	0	9	139
546271	Selenomonas sputigena ATCC 35185	Bacteria	no rank	148	0	0	0	0	0	0	9	139
970	Selenomonas	Bacteria	genus	148	0	0	0	0	0	0	9	139
32257	Kingella	Bacteria	genus	148	0	0	0	0	0	0	111	37
259537	Dechloromonas aromatica	Bacteria	species	147	0	0	0	0	0	147	0	0
206389	Rhodocyclales	Bacteria	order	147	0	0	0	0	0	147	0	0
159087	Dechloromonas aromatica RCB	Bacteria	no rank	147	0	0	0	0	0	147	0	0
73029	Dechloromonas	Bacteria	genus	147	0	0	0	0	0	147	0	0
75787	Rhodocyclaceae	Bacteria	family	147	0	0	0	0	0	147	0	0
45401	Hyphomicrobiaceae	Bacteria	family	143	0	28	0	0	0	0	30	85
262728	Haemophilus influenzae R2866	Bacteria	no rank	139	0	0	0	0	0	0	139	0
531844	Flavobacteriaceae bacterium 3519-10	Bacteria	species	135	63	20	35	17	0	0	0	0
61432	unclassified Flavobacteriaceae	Bacteria	no rank	135	63	20	35	17	0	0	0	0
838	Prevotella	Bacteria	genus	132	0	0	0	80	0	0	24	28
171552	Prevotellaceae	Bacteria	family	132	0	0	0	80	0	0	24	28
851	Fusobacterium nucleatum	Bacteria	species	131	0	0	0	0	0	0	61	70
1762	Mycobacteriaceae	Bacteria	family	130	2	0	9	0	0	78	41	0
272630	Methylobacterium extorquens AM1	Bacteria	no rank	129	0	0	0	129	0	0	0	0
82115	Rhizobiaceae	Bacteria	family	128	0	68	0	0	0	6	5	49
76856	Fusobacterium nucleatum subsp. nucleatum	Bacteria	subspecies	126	0	0	0	0	0	0	61	65
190304	Fusobacterium nucleatum subsp. nucleatum ATCC 25586	Bacteria	no rank	126	0	0	0	0	0	0	61	65
2350	Haliscomenobacter hydrossis	Bacteria	species	124	7	0	82	35	0	0	0	0
760192	Haliscomenobacter hydrossis DSM 1100	Bacteria	no rank	124	7	0	82	35	0	0	0	0
2349	Haliscomenobacter	Bacteria	genus	124	7	0	82	35	0	0	0	0
89374	Saprospiraceae	Bacteria	family	124	7	0	82	35	0	0	0	0
88688	Caulobacter segnis	Bacteria	species	122	0	0	0	0	0	0	0	122
509190	Caulobacter segnis ATCC 21756	Bacteria	no rank	122	0	0	0	0	0	0	0	122
1763	Mycobacterium	Bacteria	genus	121	2	0	9	0	0	78	32	0
41997	Enterococcus saccharolyticus	Bacteria	species	119	0	0	0	0	0	0	119	0
53399	Hyphomicrobium denitrificans	Bacteria	species	118	0	28	0	0	0	0	5	85
582899	Hyphomicrobium denitrificans ATCC 51888	Bacteria	no rank	118	0	28	0	0	0	0	5	85
81	Hyphomicrobium	Bacteria	genus	118	0	28	0	0	0	0	5	85
234	Brucella	Bacteria	genus	118	0	0	0	0	0	118	0	0
118882	Brucellaceae	Bacteria	family	118	0	0	0	0	0	118	0	0
1031711	Ralstonia solanacearum Po82	Bacteria	no rank	116	0	0	116	0	0	0	0	0
34085	Riemerella anatipestifer	Bacteria	species	113	85	23	5	0	0	0	0	0
34084	Riemerella	Bacteria	genus	113	85	23	5	0	0	0	0	0
100469	Actinomyces canis	Bacteria	species	112	0	0	0	0	0	0	29	83
83333	Escherichia coli K-12	Bacteria	no rank	111	0	0	111	0	0	0	0	0
191579	Fluviicola taffensis	Bacteria	species	110	6	8	96	0	0	0	0	0
755732	Fluviicola taffensis DSM 16823	Bacteria	no rank	110	6	8	96	0	0	0	0	0
332102	Fluviicola	Bacteria	genus	110	6	8	96	0	0	0	0	0
246874	Cryomorphaceae	Bacteria	family	110	6	8	96	0	0	0	0	0
199596	Methylocella silvestris	Bacteria	species	108	0	108	0	0	0	0	0	0
395965	Methylocella silvestris BL2	Bacteria	no rank	108	0	108	0	0	0	0	0	0
120652	Methylocella	Bacteria	genus	108	0	108	0	0	0	0	0	0
45404	Beijerinckiaceae	Bacteria	family	108	0	108	0	0	0	0	0	0
504	Kingella kingae	Bacteria	species	105	0	0	0	0	0	0	68	37
887327	Kingella kingae ATCC 23330	Bacteria	no rank	105	0	0	0	0	0	0	68	37
374	Bradyrhizobium	Bacteria	genus	105	6	70	0	0	10	0	0	19
57732	Enterococcus asini	Bacteria	species	102	0	0	0	0	0	0	0	102
28264	Arcanobacterium haemolyticum	Bacteria	species	101	0	0	0	0	0	0	30	71
644284	Arcanobacterium haemolyticum DSM 20595	Bacteria	no rank	101	0	0	0	0	0	0	30	71
28263	Arcanobacterium	Bacteria	genus	101	0	0	0	0	0	0	30	71
935897	Haemophilus influenzae F3047	Bacteria	no rank	100	0	0	0	0	0	0	0	100
119219	Cupriavidus metallidurans	Bacteria	species	99	9	0	0	0	0	0	0	90
266264	Cupriavidus metallidurans CH34	Bacteria	no rank	99	9	0	0	0	0	0	0	90
165696	Novosphingobium	Bacteria	genus	98	0	23	0	0	0	0	0	75
186828	Carnobacteriaceae	Bacteria	family	96	0	0	0	0	0	0	26	70
859657	Ralstonia solanacearum PSI07	Bacteria	no rank	94	68	0	0	0	0	26	0	0
105622	Porphyrobacter sp. KK348	Bacteria	species	91	0	0	0	0	0	0	0	91
516950	Streptococcus pneumoniae CGSP14	Bacteria	no rank	91	0	0	0	0	0	0	0	91
1111	Porphyrobacter	Bacteria	genus	91	0	0	0	0	0	0	0	91
39960	Erythrobacter litoralis	Bacteria	species	87	0	0	0	0	0	0	0	87
314225	Erythrobacter litoralis HTCC2594	Bacteria	no rank	87	0	0	0	0	0	0	0	87
1041	Erythrobacter	Bacteria	genus	87	0	0	0	0	0	0	0	87
375	Bradyrhizobium japonicum	Bacteria	species	86	6	70	0	0	10	0	0	0
224911	Bradyrhizobium japonicum USDA 110	Bacteria	no rank	86	6	70	0	0	10	0	0	0
155892	Caulobacter vibrioides	Bacteria	species	84	0	0	0	0	0	0	6	78
190650	Caulobacter crescentus CB15	Bacteria	no rank	84	0	0	0	0	0	0	6	78
565050	Caulobacter crescentus NA1000	Bacteria	no rank	84	0	0	0	0	0	0	6	78
28129	Prevotella denticola	Bacteria	species	80	0	0	0	80	0	0	0	0
83427	uncultured Streptococcus sp.	Bacteria	species	80	0	0	0	0	0	0	0	80
83426	environmental samples	Bacteria	no rank	80	0	0	0	0	0	0	0	80
767031	Prevotella denticola F0289	Bacteria	no rank	80	0	0	0	80	0	0	0	0
55565	Actinomyces graevenitzii	Bacteria	species	79	0	0	0	0	0	0	0	79
702113	Novosphingobium sp. PP1Y	Bacteria	species	75	0	0	0	0	0	0	0	75
1772	Mycobacterium smegmatis	Bacteria	species	73	2	0	0	0	0	71	0	0
246196	Mycobacterium smegmatis str. MC2 155	Bacteria	no rank	73	2	0	0	0	0	71	0	0
114707	uncultured Pseudomonas sp.	Bacteria	species	70	0	0	0	0	0	0	0	70
137732	Granulicatella elegans	Bacteria	species	70	0	0	0	0	0	0	0	70
62104	environmental samples	Bacteria	no rank	70	0	0	0	0	0	0	0	70
626369	Granulicatella elegans ATCC 700633	Bacteria	no rank	70	0	0	0	0	0	0	0	70
117563	Granulicatella	Bacteria	genus	70	0	0	0	0	0	0	0	70
693978	Riemerella anatipestifer DSM 15868	Bacteria	no rank	69	46	23	0	0	0	0	0	0
380	Sinorhizobium fredii	Bacteria	species	68	0	68	0	0	0	0	0	0
40324	Stenotrophomonas maltophilia	Bacteria	species	68	0	0	0	57	0	0	0	11
135614	Xanthomonadales	Bacteria	order	68	0	0	0	57	0	0	0	11
394	Sinorhizobium fredii NGR234	Bacteria	no rank	68	0	68	0	0	0	0	0	0
227292	Sinorhizobium/Ensifer group	Bacteria	no rank	68	0	68	0	0	0	0	0	0
663276	Sinorhizobium fredii group	Bacteria	no rank	68	0	68	0	0	0	0	0	0
995085	Stenotrophomonas maltophilia group	Bacteria	no rank	68	0	0	0	57	0	0	0	11
28105	Sinorhizobium	Bacteria	genus	68	0	68	0	0	0	0	0	0
40323	Stenotrophomonas	Bacteria	genus	68	0	0	0	57	0	0	0	11
32033	Xanthomonadaceae	Bacteria	family	68	0	0	0	57	0	0	0	11
85010	Pseudonocardineae	Bacteria	suborder	67	0	38	0	0	0	0	29	0
9	Buchnera aphidicola	Bacteria	species	66	66	0	0	0	0	0	0	0
32199	Buchnera	Bacteria	genus	66	66	0	0	0	0	0	0	0
1717	Corynebacterium diphtheriae	Bacteria	species	65	0	0	0	0	0	0	43	22
661410	Methylobacterium extorquens DM4	Bacteria	no rank	62	0	0	0	0	0	62	0	0
227290	Rhizobium/Agrobacterium group	Bacteria	no rank	60	0	0	0	0	0	6	5	49
731	Histophilus somni	Bacteria	species	59	0	0	0	59	0	0	0	0
91750	uncultured alpha proteobacterium	Bacteria	species	59	0	0	0	0	0	0	0	59
47925	environmental samples	Bacteria	no rank	59	0	0	0	0	0	0	0	59
205914	Haemophilus somnus 129PT	Bacteria	no rank	59	0	0	0	59	0	0	0	0
214906	Histophilus	Bacteria	genus	59	0	0	0	59	0	0	0	0
1288	Staphylococcus xylosus	Bacteria	species	57	0	0	0	0	0	0	0	57
522373	Stenotrophomonas maltophilia K279a	Bacteria	no rank	57	0	0	0	57	0	0	0	0
84566	Sphingobacteriaceae	Bacteria	family	57	9	8	0	0	0	32	0	8
747	Pasteurella multocida	Bacteria	species	56	0	0	0	0	0	0	56	0
745	Pasteurella	Bacteria	genus	56	0	0	0	0	0	0	56	0
1656	Actinomyces viscosus	Bacteria	species	54	0	0	0	0	0	0	19	35
379	Rhizobium	Bacteria	genus	54	0	0	0	0	0	0	5	49
28132	Prevotella melaninogenica	Bacteria	species	52	0	0	0	0	0	0	24	28
553174	Prevotella melaninogenica ATCC 25845	Bacteria	no rank	52	0	0	0	0	0	0	24	28
316068	Leadbetterella byssophila	Bacteria	species	51	0	0	0	51	0	0	0	0
649349	Leadbetterella byssophila DSM 17132	Bacteria	no rank	51	0	0	0	51	0	0	0	0
44249	Paenibacillus	Bacteria	genus	51	0	0	0	0	0	0	0	51
319458	Leadbetterella	Bacteria	genus	51	0	0	0	51	0	0	0	0
186822	Paenibacillaceae	Bacteria	family	51	0	0	0	0	0	0	0	51
100716	Chloroherpeton thalassium	Bacteria	species	50	0	0	0	0	0	0	12	38
232721	Acidovorax sp. JS42	Bacteria	species	50	0	0	0	12	6	32	0	0
1090	Chlorobi	Bacteria	phylum	50	0	0	0	0	0	0	12	38
191411	Chlorobiales	Bacteria	order	50	0	0	0	0	0	0	12	38
517418	Chloroherpeton thalassium ATCC 35110	Bacteria	no rank	50	0	0	0	0	0	0	12	38
100715	Chloroherpeton	Bacteria	genus	50	0	0	0	0	0	0	12	38
191412	Chlorobiaceae	Bacteria	family	50	0	0	0	0	0	0	12	38
191410	Chlorobia	Bacteria	class	50	0	0	0	0	0	0	12	38
526645	uncultured bacterium AD12-C5	Bacteria	species	49	0	0	0	0	0	0	0	49
405532	Bacillus cereus B4264	Bacteria	no rank	49	0	0	7	42	0	0	0	0
1283	Staphylococcus haemolyticus	Bacteria	species	48	0	0	41	0	0	0	7	0
186802	Clostridiales	Bacteria	order	48	0	0	0	5	0	0	28	15
279808	Staphylococcus haemolyticus JCSC1435	Bacteria	no rank	48	0	0	41	0	0	0	7	0
186801	Clostridia	Bacteria	class	48	0	0	0	5	0	0	28	15
405	Methylobacillus flagellatus	Bacteria	species	46	46	0	0	0	0	0	0	0
206350	Methylophilales	Bacteria	order	46	46	0	0	0	0	0	0	0
265072	Methylobacillus flagellatus KT	Bacteria	no rank	46	46	0	0	0	0	0	0	0
404	Methylobacillus	Bacteria	genus	46	46	0	0	0	0	0	0	0
32011	Methylophilaceae	Bacteria	family	46	46	0	0	0	0	0	0	0
248026	Cupriavidus pinatubonensis	Bacteria	species	45	0	0	0	0	0	0	0	45
264198	Ralstonia eutropha JMP134	Bacteria	no rank	45	0	0	0	0	0	0	0	45
84567	Pedobacter	Bacteria	genus	45	5	8	0	0	0	32	0	0
165695	Sphingobium	Bacteria	genus	45	4	18	0	0	0	0	6	17
1016	Capnocytophaga	Bacteria	genus	44	0	0	0	0	0	0	44	0
290399	Arthrobacter sp. FB24	Bacteria	species	43	0	0	0	43	0	0	0	0
1663	Arthrobacter	Bacteria	genus	43	0	0	0	43	0	0	0	0
59754	Alcanivorax borkumensis	Bacteria	species	41	0	0	41	0	0	0	0	0
79880	Bacillus clausii	Bacteria	species	41	0	0	0	0	0	0	0	41
135619	Oceanospirillales	Bacteria	order	41	0	0	41	0	0	0	0	0
66692	Bacillus clausii KSM-K16	Bacteria	no rank	41	0	0	0	0	0	0	0	41
393595	Alcanivorax borkumensis SK2	Bacteria	no rank	41	0	0	41	0	0	0	0	0
59753	Alcanivorax	Bacteria	genus	41	0	0	41	0	0	0	0	0
75682	Oxalobacteraceae	Bacteria	family	41	0	41	0	0	0	0	0	0
224372	Alcanivoracaceae	Bacteria	family	41	0	0	41	0	0	0	0	0
84757	Beutenbergia cavernae	Bacteria	species	40	0	0	0	0	0	0	0	40
145656	unknown marine alpha proteobacterium JP57	Bacteria	species	40	0	0	0	0	0	0	0	40
252307	Robiginitalea biformata	Bacteria	species	40	0	0	34	6	0	0	0	0
33807	unclassified Alphaproteobacteria (miscellaneous)	Bacteria	no rank	40	0	0	0	0	0	0	0	40
82117	unclassified Alphaproteobacteria	Bacteria	no rank	40	0	0	0	0	0	0	0	40
313596	Robiginitalea biformata HTCC2501	Bacteria	no rank	40	0	0	34	6	0	0	0	0
471853	Beutenbergia cavernae DSM 12333	Bacteria	no rank	40	0	0	0	0	0	0	0	40
84756	Beutenbergia	Bacteria	genus	40	0	0	0	0	0	0	0	40
252306	Robiginitalea	Bacteria	genus	40	0	0	34	6	0	0	0	0
125316	Beutenbergiaceae	Bacteria	family	40	0	0	0	0	0	0	0	40
465515	Micrococcus luteus NCTC 2665	Bacteria	no rank	39	24	0	9	0	0	0	0	6
1076	Rhodopseudomonas palustris	Bacteria	species	38	0	0	0	0	0	0	0	38
40567	Actinosynnema mirum	Bacteria	species	38	0	38	0	0	0	0	0	0
374931	Haemophilus influenzae PittGG	Bacteria	no rank	38	0	0	0	0	0	0	29	9
446462	Actinosynnema mirum DSM 43827	Bacteria	no rank	38	0	38	0	0	0	0	0	0
652103	Rhodopseudomonas palustris DX-1	Bacteria	no rank	38	0	0	0	0	0	0	0	38
1073	Rhodopseudomonas	Bacteria	genus	38	0	0	0	0	0	0	0	38
40566	Actinosynnema	Bacteria	genus	38	0	38	0	0	0	0	0	0
103957	Actinosynnemataceae	Bacteria	family	38	0	38	0	0	0	0	0	0
316385	Escherichia coli str. K-12 substr. DH10B	Bacteria	no rank	36	0	0	36	0	0	0	0	0
935593	Neisseria meningitidis M04-240196	Bacteria	no rank	36	0	0	0	0	0	0	0	36
85025	Nocardiaceae	Bacteria	family	36	0	26	0	0	0	0	0	10
714	Aggregatibacter actinomycetemcomitans	Bacteria	species	35	3	0	0	0	0	0	0	32
176280	Staphylococcus epidermidis ATCC 12228	Bacteria	no rank	35	15	20	0	0	0	0	0	0
668336	Aggregatibacter actinomycetemcomitans D11S-1	Bacteria	no rank	35	3	0	0	0	0	0	0	32
31965	Clavibacter michiganensis subsp. tessellarius	Bacteria	subspecies	32	0	0	0	0	0	0	0	32
28447	Clavibacter michiganensis	Bacteria	species	32	0	0	0	0	0	0	0	32
151895	Pedobacter saltans	Bacteria	species	32	0	0	0	0	0	32	0	0
762903	Pedobacter saltans DSM 12145	Bacteria	no rank	32	0	0	0	0	0	32	0	0
1485	Clostridium	Bacteria	genus	32	0	0	0	5	0	0	12	15
1573	Clavibacter	Bacteria	genus	32	0	0	0	0	0	0	0	32
31979	Clostridiaceae	Bacteria	family	32	0	0	0	5	0	0	12	15
68909	Deinococcus geothermalis	Bacteria	species	31	0	0	0	0	0	31	0	0
1297	Deinococcus-Thermus	Bacteria	phylum	31	0	0	0	0	0	31	0	0
118964	Deinococcales	Bacteria	order	31	0	0	0	0	0	31	0	0
319795	Deinococcus geothermalis DSM 11300	Bacteria	no rank	31	0	0	0	0	0	31	0	0
405531	Bacillus cereus G9842	Bacteria	no rank	31	0	0	6	25	0	0	0	0
1298	Deinococcus	Bacteria	genus	31	0	0	0	0	0	31	0	0
183710	Deinococcaceae	Bacteria	family	31	0	0	0	0	0	31	0	0
188787	Deinococci	Bacteria	class	31	0	0	0	0	0	31	0	0
1018	Capnocytophaga ochracea	Bacteria	species	30	0	0	0	0	0	0	30	0
324057	Paenibacillus sp. JDR-2	Bacteria	species	30	0	0	0	0	0	0	0	30
521097	Capnocytophaga ochracea DSM 7271	Bacteria	no rank	30	0	0	0	0	0	0	30	0
32067	Leptotrichia	Bacteria	genus	29	0	0	0	0	0	0	29	0
2070	Pseudonocardiaceae	Bacteria	family	29	0	0	0	0	0	0	29	0
85013	Frankineae	Bacteria	suborder	28	0	0	0	0	0	0	28	0
114616	Methylobacterium nodulans	Bacteria	species	28	0	0	0	0	0	0	0	28
185300	Paludibacter propionicigenes	Bacteria	species	28	0	0	14	14	0	0	0	0
460265	Methylobacterium nodulans ORS 2060	Bacteria	no rank	28	0	0	0	0	0	0	0	28
694427	Paludibacter propionicigenes WB4	Bacteria	no rank	28	0	0	14	14	0	0	0	0
1854	Frankia	Bacteria	genus	28	0	0	0	0	0	0	28	0
346096	Paludibacter	Bacteria	genus	28	0	0	14	14	0	0	0	0
74712	Frankiaceae	Bacteria	family	28	0	0	0	0	0	0	28	0
171551	Porphyromonadaceae	Bacteria	family	28	0	0	14	14	0	0	0	0
1833	Rhodococcus erythropolis	Bacteria	species	26	0	26	0	0	0	0	0	0
208596	Carnobacterium sp. 17-4	Bacteria	species	26	0	0	0	0	0	0	26	0
234621	Rhodococcus erythropolis PR4	Bacteria	no rank	26	0	26	0	0	0	0	0	0
1827	Rhodococcus	Bacteria	genus	26	0	26	0	0	0	0	0	0
2747	Carnobacterium	Bacteria	genus	26	0	0	0	0	0	0	26	0
1069	Rhodomicrobium vannielii	Bacteria	species	25	0	0	0	0	0	0	25	0
79885	Bacillus pseudofirmus	Bacteria	species	25	0	0	0	0	0	0	25	0
398511	Bacillus pseudofirmus OF4	Bacteria	no rank	25	0	0	0	0	0	0	25	0
648757	Rhodomicrobium vannielii ATCC 17100	Bacteria	no rank	25	0	0	0	0	0	0	25	0
1068	Rhodomicrobium	Bacteria	genus	25	0	0	0	0	0	0	25	0
81850	Leuconostocaceae	Bacteria	family	25	0	0	0	0	0	0	0	25
62322	Shewanella baltica	Bacteria	species	24	0	4	0	20	0	0	0	0
226900	Bacillus cereus ATCC 14579	Bacteria	no rank	24	0	0	24	0	0	0	0	0
1718	Corynebacterium glutamicum	Bacteria	species	23	0	0	0	0	0	0	0	23
48935	Novosphingobium aromaticivorans	Bacteria	species	23	0	23	0	0	0	0	0	0
312306	Pseudomonas entomophila	Bacteria	species	23	23	0	0	0	0	0	0	0
279238	Novosphingobium aromaticivorans DSM 12444	Bacteria	no rank	23	0	23	0	0	0	0	0	0
384676	Pseudomonas entomophila L48	Bacteria	no rank	23	23	0	0	0	0	0	0	0
1006	Marivirga tractuosa	Bacteria	species	22	6	0	11	0	0	5	0	0
643867	Marivirga tractuosa DSM 4126	Bacteria	no rank	22	6	0	11	0	0	5	0	0
816	Bacteroides	Bacteria	genus	22	0	0	0	0	0	0	22	0
869806	Marivirga	Bacteria	genus	22	6	0	11	0	0	5	0	0
815	Bacteroidaceae	Bacteria	family	22	0	0	0	0	0	0	22	0
200667	Flammeovirgaceae	Bacteria	family	22	6	0	11	0	0	5	0	0
1014	Weeksella virosa	Bacteria	species	21	0	0	0	0	0	0	0	21
1356	Enterococcus sulfureus	Bacteria	species	21	0	0	0	0	0	0	0	21
1406	Paenibacillus polymyxa	Bacteria	species	21	0	0	0	0	0	0	0	21
1852	Saccharomonospora viridis	Bacteria	species	21	0	0	0	0	0	0	21	0
508458	Synergistetes	Bacteria	phylum	21	0	0	0	0	0	0	21	0
47926	environmental samples	Bacteria	no rank	21	0	0	0	0	0	0	0	21
331111	Escherichia coli E24377A	Bacteria	no rank	21	0	0	21	0	0	0	0	0
349520	Paenibacillus polymyxa E681	Bacteria	no rank	21	0	0	0	0	0	0	0	21
471857	Saccharomonospora viridis DSM 43017	Bacteria	no rank	21	0	0	0	0	0	0	21	0
865938	Weeksella virosa DSM 16922	Bacteria	no rank	21	0	0	0	0	0	0	0	21
1013	Weeksella	Bacteria	genus	21	0	0	0	0	0	0	0	21
1851	Saccharomonospora	Bacteria	genus	21	0	0	0	0	0	0	21	0
471	Acinetobacter calcoaceticus	Bacteria	species	20	0	0	0	0	0	0	0	20
1658	Actinomyces bovis	Bacteria	species	20	0	0	0	0	0	0	11	9
45610	Psychrobacter urativorans	Bacteria	species	20	0	0	20	0	0	0	0	0
402882	Shewanella baltica OS185	Bacteria	no rank	20	0	0	0	20	0	0	0	0
981331	Acinetobacter calcoaceticus DSM 30006	Bacteria	no rank	20	0	0	0	0	0	0	0	20
85009	Propionibacterineae	Bacteria	suborder	19	5	0	0	0	0	0	0	14
964	Herbaspirillum seropedicae	Bacteria	species	19	0	19	0	0	0	0	0	0
152509	uncultured Bacteroidetes bacterium	Bacteria	species	19	0	0	0	0	0	0	19	0
607712	Neisseria shayeganii	Bacteria	species	19	0	0	0	0	0	0	19	0
203691	Spirochaetes	Bacteria	phylum	19	0	0	0	0	0	0	12	7
136	Spirochaetales	Bacteria	order	19	0	0	0	0	0	0	12	7
50742	environmental samples	Bacteria	no rank	19	0	0	0	0	0	0	19	0
757424	Herbaspirillum seropedicae SmR1	Bacteria	no rank	19	0	19	0	0	0	0	0	0
1032488	Neisseria shayeganii 871	Bacteria	no rank	19	0	0	0	0	0	0	19	0
157	Treponema	Bacteria	genus	19	0	0	0	0	0	0	12	7
963	Herbaspirillum	Bacteria	genus	19	0	19	0	0	0	0	0	0
46255	Weissella	Bacteria	genus	19	0	0	0	0	0	0	0	19
137	Spirochaetaceae	Bacteria	family	19	0	0	0	0	0	0	12	7
85015	Nocardioidaceae	Bacteria	family	19	5	0	0	0	0	0	0	14
203692	Spirochaetes (class)	Bacteria	class	19	0	0	0	0	0	0	12	7
478	Moraxella nonliquefaciens	Bacteria	species	18	0	0	0	0	0	0	0	18
332056	Sphingobium japonicum	Bacteria	species	18	0	18	0	0	0	0	0	0
1118	Chroococcales	Bacteria	order	18	0	0	12	0	0	0	0	6
135058	environmental samples	Bacteria	no rank	18	0	0	0	0	0	0	18	0
452662	Sphingobium japonicum UT26S	Bacteria	no rank	18	0	18	0	0	0	0	0	0
38289	Corynebacterium jeikeium	Bacteria	species	17	0	0	0	0	0	0	0	17
56193	Sphingobium chungbukense	Bacteria	species	17	0	0	0	0	0	0	0	17
306537	Corynebacterium jeikeium K411	Bacteria	no rank	17	0	0	0	0	0	0	0	17
1405	Bacillus mycoides	Bacteria	species	16	16	0	0	0	0	0	0	0
152794	Corynebacterium efficiens	Bacteria	species	16	0	0	0	0	0	0	0	16
157673	Mannheimia succiniciproducens	Bacteria	species	16	0	0	0	0	0	0	0	16
364317	Verminephrobacter eiseniae	Bacteria	species	16	0	16	0	0	0	0	0	0
751585	Coprococcus sp. ART55/1	Bacteria	species	16	0	0	0	0	0	0	16	0
196164	Corynebacterium efficiens YS-314	Bacteria	no rank	16	0	0	0	0	0	0	0	16
221988	Mannheimia succiniciproducens MBEL55E	Bacteria	no rank	16	0	0	0	0	0	0	0	16
391735	Verminephrobacter eiseniae EF01-2	Bacteria	no rank	16	0	16	0	0	0	0	0	0
33042	Coprococcus	Bacteria	genus	16	0	0	0	0	0	0	16	0
364316	Verminephrobacter	Bacteria	genus	16	0	16	0	0	0	0	0	0
697331	Basfia	Bacteria	genus	16	0	0	0	0	0	0	0	16
186803	Lachnospiraceae	Bacteria	family	16	0	0	0	0	0	0	16	0
85012	Streptosporangineae	Bacteria	suborder	15	0	0	0	0	0	0	15	0
1502	Clostridium perfringens	Bacteria	species	15	0	0	0	0	0	0	0	15
2021	Thermobifida fusca	Bacteria	species	15	0	0	0	0	0	0	15	0
269800	Thermobifida fusca YX	Bacteria	no rank	15	0	0	0	0	0	0	15	0
83677	Thermobifida	Bacteria	genus	15	0	0	0	0	0	0	15	0
83676	Nocardiopsaceae	Bacteria	family	15	0	0	0	0	0	0	15	0
238	Elizabethkingia meningoseptica	Bacteria	species	14	14	0	0	0	0	0	0	0
913	Nitrobacter winogradskyi	Bacteria	species	14	0	0	0	0	0	0	0	14
196162	Nocardioides sp. JS614	Bacteria	species	14	0	0	0	0	0	0	0	14
29339	Bacillus thuringiensis serovar kurstaki	Bacteria	no rank	14	14	0	0	0	0	0	0	0
323098	Nitrobacter winogradskyi Nb-255	Bacteria	no rank	14	0	0	0	0	0	0	0	14
714359	Bacillus thuringiensis BMB171	Bacteria	no rank	14	14	0	0	0	0	0	0	0
911	Nitrobacter	Bacteria	genus	14	0	0	0	0	0	0	0	14
1839	Nocardioides	Bacteria	genus	14	0	0	0	0	0	0	0	14
308865	Elizabethkingia	Bacteria	genus	14	14	0	0	0	0	0	0	0
622	Shigella dysenteriae	Bacteria	species	13	0	13	0	0	0	0	0	0
984	Pedobacter heparinus	Bacteria	species	13	5	8	0	0	0	0	0	0
134605	Fusobacterium equinum	Bacteria	species	13	0	0	0	0	0	0	0	13
204038	Dickeya dadantii	Bacteria	species	13	0	13	0	0	0	0	0	0
386487	Candidatus Ruthia magnifica	Bacteria	species	13	0	0	9	4	0	0	0	0
713033	Synergistetes bacterium oral taxon 359	Bacteria	species	13	0	0	0	0	0	0	13	0
983548	Krokinobacter sp. 4H-3-7-5	Bacteria	species	13	13	0	0	0	0	0	0	0
32036	sulfur-oxidizing symbionts	Bacteria	no rank	13	0	0	9	4	0	0	0	0
118884	unclassified Gammaproteobacteria	Bacteria	no rank	13	0	0	9	4	0	0	0	0
300267	Shigella dysenteriae Sd197	Bacteria	no rank	13	0	13	0	0	0	0	0	0
413404	Candidatus Ruthia magnifica str. Cm (Calyptogena magnifica)	Bacteria	no rank	13	0	0	9	4	0	0	0	0
485917	Pedobacter heparinus DSM 2366	Bacteria	no rank	13	5	8	0	0	0	0	0	0
508677	unclassified Synergistetes	Bacteria	no rank	13	0	0	0	0	0	0	13	0
579405	Dickeya dadantii Ech703	Bacteria	no rank	13	0	13	0	0	0	0	0	0
204037	Dickeya	Bacteria	genus	13	0	13	0	0	0	0	0	0
308112	Krokinobacter	Bacteria	genus	13	13	0	0	0	0	0	0	0
85008	Micromonosporineae	Bacteria	suborder	12	0	0	0	0	0	0	0	12
255727	Coriobacterineae	Bacteria	suborder	12	0	0	12	0	0	0	0	0
84998	Coriobacteridae	Bacteria	subclass	12	0	0	12	0	0	0	0	0
158	Treponema denticola	Bacteria	species	12	0	0	0	0	0	0	12	0
1493	Clostridium cellulovorans	Bacteria	species	12	0	0	0	0	0	0	12	0
28151	Serratia proteamaculans	Bacteria	species	12	0	12	0	0	0	0	0	0
32046	Synechococcus elongatus	Bacteria	species	12	0	0	12	0	0	0	0	0
77152	Moraxella sp. TA144	Bacteria	species	12	0	0	0	12	0	0	0	0
84112	Eggerthella lenta	Bacteria	species	12	0	0	12	0	0	0	0	0
86027	uncultured beta proteobacterium	Bacteria	species	12	0	0	0	0	0	0	0	12
381796	uncultured endolithic bacterium	Bacteria	species	12	0	0	0	0	0	0	0	12
690129	Chryseobacterium sp. N28	Bacteria	species	12	12	0	0	0	0	0	0	0
795830	Candidatus Brocadia sinica	Bacteria	species	12	0	0	0	0	0	0	0	12
203682	Planctomycetes	Bacteria	phylum	12	0	0	0	0	0	0	0	12
112	Planctomycetales	Bacteria	order	12	0	0	0	0	0	0	0	12
84999	Coriobacteriales	Bacteria	order	12	0	0	12	0	0	0	0	0
107630	unclassified Planctomycetales	Bacteria	no rank	12	0	0	0	0	0	0	0	12
243275	Treponema denticola ATCC 35405	Bacteria	no rank	12	0	0	0	0	0	0	12	0
399741	Serratia proteamaculans 568	Bacteria	no rank	12	0	12	0	0	0	0	0	0
479437	Eggerthella lenta DSM 2243	Bacteria	no rank	12	0	0	12	0	0	0	0	0
573061	Clostridium cellulovorans 743B	Bacteria	no rank	12	0	0	0	0	0	0	12	0
1129	Synechococcus	Bacteria	genus	12	0	0	12	0	0	0	0	0
28453	Sphingobacterium	Bacteria	genus	12	4	0	0	0	0	0	0	8
59732	Chryseobacterium	Bacteria	genus	12	12	0	0	0	0	0	0	0
84111	Eggerthella	Bacteria	genus	12	0	0	12	0	0	0	0	0
380240	Candidatus Brocadia	Bacteria	genus	12	0	0	0	0	0	0	0	12
28056	Micromonosporaceae	Bacteria	family	12	0	0	0	0	0	0	0	12
84107	Coriobacteriaceae	Bacteria	family	12	0	0	12	0	0	0	0	0
203683	Planctomycetacia	Bacteria	class	12	0	0	0	0	0	0	0	12
28111	Bacteroides eggerthii	Bacteria	species	11	0	0	0	0	0	0	11	0
40542	Leptotrichia buccalis	Bacteria	species	11	0	0	0	0	0	0	11	0
163581	Leptotrichia sp. oral clone DR011	Bacteria	species	11	0	0	0	0	0	0	11	0
204773	Herminiimonas arsenicoxydans	Bacteria	species	11	0	11	0	0	0	0	0	0
375286	Janthinobacterium sp. Marseille	Bacteria	species	11	0	11	0	0	0	0	0	0
376805	Bacteroides salanitronis	Bacteria	species	11	0	0	0	0	0	0	11	0
483216	Bacteroides eggerthii DSM 20697	Bacteria	no rank	11	0	0	0	0	0	0	11	0
523794	Leptotrichia buccalis C-1013-b	Bacteria	no rank	11	0	0	0	0	0	0	11	0
667015	Bacteroides salanitronis DSM 18170	Bacteria	no rank	11	0	0	0	0	0	0	11	0
29580	Janthinobacterium	Bacteria	genus	11	0	11	0	0	0	0	0	0
303379	Herminiimonas	Bacteria	genus	11	0	11	0	0	0	0	0	0
40041	Streptococcus equi subsp. zooepidemicus	Bacteria	subspecies	10	0	0	0	0	0	0	10	0
1409	Bacillus sp.	Bacteria	species	10	0	0	0	0	0	0	10	0
37329	Nocardia farcinica	Bacteria	species	10	0	0	0	0	0	0	0	10
96345	Flavobacterium psychrophilum	Bacteria	species	10	10	0	0	0	0	0	0	0
266779	Chelativorans sp. BNC1	Bacteria	species	10	0	10	0	0	0	0	0	0
247156	Nocardia farcinica IFM 10152	Bacteria	no rank	10	0	0	0	0	0	0	0	10
402612	Flavobacterium psychrophilum JIP02/86	Bacteria	no rank	10	10	0	0	0	0	0	0	0
1817	Nocardia	Bacteria	genus	10	0	0	0	0	0	0	0	10
449972	Chelativorans	Bacteria	genus	10	0	10	0	0	0	0	0	0
1063	Rhodobacter sphaeroides	Bacteria	species	9	0	0	9	0	0	0	0	0
47850	Micromonospora aurantiaca	Bacteria	species	9	0	0	0	0	0	0	0	9
88805	uncultured bacterium NIC030	Bacteria	species	9	0	0	0	0	0	0	0	9
256618	Parvibaculum lavamentivorans	Bacteria	species	9	0	0	0	9	0	0	0	0
387092	Nitratiruptor sp. SB155-2	Bacteria	species	9	0	0	0	0	0	0	0	9
639313	Amycolicicoccus subflavus	Bacteria	species	9	0	0	0	0	0	0	9	0
204455	Rhodobacterales	Bacteria	order	9	0	0	9	0	0	0	0	0
34035	unclassified Epsilonproteobacteria	Bacteria	no rank	9	0	0	0	0	0	0	0	9
272943	Rhodobacter sphaeroides 2.4.1	Bacteria	no rank	9	0	0	9	0	0	0	0	0
402881	Parvibaculum lavamentivorans DS-1	Bacteria	no rank	9	0	0	0	9	0	0	0	0
443218	Amycolicicoccus subflavus DQS3-9A1	Bacteria	no rank	9	0	0	0	0	0	0	9	0
644283	Micromonospora aurantiaca ATCC 27029	Bacteria	no rank	9	0	0	0	0	0	0	0	9
222	Achromobacter	Bacteria	genus	9	0	0	0	4	0	0	5	0
1060	Rhodobacter	Bacteria	genus	9	0	0	9	0	0	0	0	0
1253	Pediococcus	Bacteria	genus	9	0	0	0	0	0	0	0	9
1873	Micromonospora	Bacteria	genus	9	0	0	0	0	0	0	0	9
129337	Geobacillus	Bacteria	genus	9	0	0	0	0	0	0	0	9
256616	Parvibaculum	Bacteria	genus	9	0	0	0	9	0	0	0	0
269258	Nitratiruptor	Bacteria	genus	9	0	0	0	0	0	0	0	9
992401	Amycolicicoccus	Bacteria	genus	9	0	0	0	0	0	0	9	0
31989	Rhodobacteraceae	Bacteria	family	9	0	0	9	0	0	0	0	0
1836	Saccharopolyspora erythraea	Bacteria	species	8	0	0	0	0	0	0	8	0
330214	Candidatus Nitrospira defluvii	Bacteria	species	8	0	0	0	8	0	0	0	0
354471	Bergeyella sp. AF14	Bacteria	species	8	0	0	0	0	0	0	0	8
398743	Zunongwangia profunda	Bacteria	species	8	2	0	0	6	0	0	0	0
640510	Burkholderia sp. CCGE1001	Bacteria	species	8	0	8	0	0	0	0	0	0
710992	uncultured Sphingobacterium sp. EB080_L08E11	Bacteria	species	8	0	0	0	0	0	0	0	8
40117	Nitrospirae	Bacteria	phylum	8	0	0	0	8	0	0	0	0
544448	Tenericutes	Bacteria	phylum	8	0	0	0	0	0	0	8	0
2085	Mycoplasmatales	Bacteria	order	8	0	0	0	0	0	0	8	0
189778	Nitrospirales	Bacteria	order	8	0	0	0	8	0	0	0	0
182687	environmental samples	Bacteria	no rank	8	0	0	0	0	0	0	0	8
405948	Saccharopolyspora erythraea NRRL 2338	Bacteria	no rank	8	0	0	0	0	0	0	8	0
655815	Zunongwangia profunda SM-A87	Bacteria	no rank	8	2	0	0	6	0	0	0	0
662598	Neisseria meningitidis alpha14	Bacteria	no rank	8	0	0	0	0	0	0	0	8
698737	Staphylococcus lugdunensis HKU09-01	Bacteria	no rank	8	0	0	0	0	0	0	0	8
1234	Nitrospira	Bacteria	genus	8	0	0	0	8	0	0	0	0
1835	Saccharopolyspora	Bacteria	genus	8	0	0	0	0	0	0	8	0
2093	Mycoplasma	Bacteria	genus	8	0	0	0	0	0	0	8	0
59735	Bergeyella	Bacteria	genus	8	0	0	0	0	0	0	0	8
417127	Zunongwangia	Bacteria	genus	8	2	0	0	6	0	0	0	0
2092	Mycoplasmataceae	Bacteria	family	8	0	0	0	0	0	0	8	0
189779	Nitrospiraceae	Bacteria	family	8	0	0	0	8	0	0	0	0
31969	Mollicutes	Bacteria	class	8	0	0	0	0	0	0	8	0
203693	Nitrospira (class)	Bacteria	class	8	0	0	0	8	0	0	0	0
111527	pseudomallei group	Bacteria	species group	7	7	0	0	0	0	0	0	0
288	Pseudoalteromonas atlantica	Bacteria	species	7	0	0	0	7	0	0	0	0
1311	Streptococcus agalactiae	Bacteria	species	7	0	7	0	0	0	0	0	0
28037	Streptococcus mitis	Bacteria	species	7	0	0	0	0	7	0	0	0
28450	Burkholderia pseudomallei	Bacteria	species	7	7	0	0	0	0	0	0	0
80866	Delftia acidovorans	Bacteria	species	7	0	0	0	7	0	0	0	0
110539	Mycobacterium vanbaalenii	Bacteria	species	7	0	0	0	0	0	7	0	0
164546	Cupriavidus taiwanensis	Bacteria	species	7	0	0	0	0	0	0	0	7
175642	Leptotrichia sp. oral clone FP036	Bacteria	species	7	0	0	0	0	0	0	7	0
212695	uncultured Flavobacteria bacterium	Bacteria	species	7	0	0	7	0	0	0	0	0
80843	environmental samples	Bacteria	no rank	7	0	0	7	0	0	0	0	0
316401	Escherichia coli ETEC H10407	Bacteria	no rank	7	0	0	7	0	0	0	0	0
342610	Pseudoalteromonas atlantica T6c	Bacteria	no rank	7	0	0	0	7	0	0	0	0
350058	Mycobacterium vanbaalenii PYR-1	Bacteria	no rank	7	0	0	0	0	0	7	0	0
357348	Burkholderia pseudomallei 1106a	Bacteria	no rank	7	7	0	0	0	0	0	0	0
365659	Streptococcus mitis B6	Bacteria	no rank	7	0	0	0	0	7	0	0	0
398578	Delftia acidovorans SPH-1	Bacteria	no rank	7	0	0	0	7	0	0	0	0
977880	Cupriavidus taiwanensis LMG 19424	Bacteria	no rank	7	0	0	0	0	0	0	0	7
992406	Riemerella anatipestifer RA-GD	Bacteria	no rank	7	7	0	0	0	0	0	0	0
80865	Delftia	Bacteria	genus	7	0	0	0	7	0	0	0	0
578833	Pseudomonas stutzeri subgroup	Bacteria	species subgroup	6	0	6	0	0	0	0	0	0
136846	Pseudomonas stutzeri group	Bacteria	species group	6	0	6	0	0	0	0	0	0
316	Pseudomonas stutzeri	Bacteria	species	6	0	6	0	0	0	0	0	0
358	Agrobacterium tumefaciens	Bacteria	species	6	0	0	0	0	0	6	0	0
536	Chromobacterium violaceum	Bacteria	species	6	0	0	0	6	0	0	0	0
985	Cytophaga hutchinsonii	Bacteria	species	6	0	0	0	6	0	0	0	0
1246	Leuconostoc lactis	Bacteria	species	6	0	0	0	0	0	0	0	6
28141	Cronobacter sakazakii	Bacteria	species	6	0	0	0	0	0	6	0	0
33945	Enterococcus avium	Bacteria	species	6	0	0	0	0	0	0	0	6
65393	Cyanothece sp. PCC 7424	Bacteria	species	6	0	0	0	0	0	0	0	6
167972	uncultured Enterococcus sp.	Bacteria	species	6	0	0	0	0	0	0	0	6
471223	Geobacillus sp. WCH70	Bacteria	species	6	0	0	0	0	0	0	0	6
709797	Bradyrhizobiaceae bacterium SG-6C	Bacteria	species	6	0	0	0	0	0	0	0	6
81426	unclassified Bradyrhizobiaceae	Bacteria	no rank	6	0	0	0	0	0	0	0	6
90153	Chromobacterium group	Bacteria	no rank	6	0	0	0	6	0	0	0	0
167971	environmental samples	Bacteria	no rank	6	0	0	0	0	0	0	0	6
243365	Chromobacterium violaceum ATCC 12472	Bacteria	no rank	6	0	0	0	6	0	0	0	0
269798	Cytophaga hutchinsonii ATCC 33406	Bacteria	no rank	6	0	0	0	6	0	0	0	0
290339	Cronobacter sakazakii ATCC BAA-894	Bacteria	no rank	6	0	0	0	0	0	6	0	0
311403	Agrobacterium radiobacter K84	Bacteria	no rank	6	0	0	0	0	0	6	0	0
340322	Corynebacterium glutamicum R	Bacteria	no rank	6	0	0	0	0	0	0	0	6
412694	Bacillus thuringiensis str. Al Hakam	Bacteria	no rank	6	0	0	0	0	0	0	0	6
859656	Ralstonia solanacearum CFBP2957	Bacteria	no rank	6	0	6	0	0	0	0	0	0
357	Agrobacterium	Bacteria	genus	6	0	0	0	0	0	6	0	0
535	Chromobacterium	Bacteria	genus	6	0	0	0	6	0	0	0	0
978	Cytophaga	Bacteria	genus	6	0	0	0	6	0	0	0	0
1243	Leuconostoc	Bacteria	genus	6	0	0	0	0	0	0	0	6
43988	Cyanothece	Bacteria	genus	6	0	0	0	0	0	0	0	6
413496	Cronobacter	Bacteria	genus	6	0	0	0	0	0	6	0	0
115117	Desulfovibrio desulfuricans subsp. desulfuricans	Bacteria	subspecies	5	0	0	0	5	0	0	0	0
876	Desulfovibrio desulfuricans	Bacteria	species	5	0	0	0	5	0	0	0	0
1172	Anabaena variabilis	Bacteria	species	5	0	0	5	0	0	0	0	0
1542	Clostridium novyi	Bacteria	species	5	0	0	0	5	0	0	0	0
182640	Kribbella flavida	Bacteria	species	5	5	0	0	0	0	0	0	0
182690	uncultured Achromobacter sp.	Bacteria	species	5	0	0	0	0	0	0	5	0
983544	Lacinutrix sp. 5H-3-7-4	Bacteria	species	5	0	0	0	5	0	0	0	0
213115	Desulfovibrionales	Bacteria	order	5	0	0	0	5	0	0	0	0
182689	environmental samples	Bacteria	no rank	5	0	0	0	0	0	0	5	0
207559	Desulfovibrio desulfuricans subsp. desulfuricans str. G20	Bacteria	no rank	5	0	0	0	5	0	0	0	0
240292	Anabaena variabilis ATCC 29413	Bacteria	no rank	5	0	0	5	0	0	0	0	0
386415	Clostridium novyi NT	Bacteria	no rank	5	0	0	0	5	0	0	0	0
479435	Kribbella flavida DSM 17836	Bacteria	no rank	5	5	0	0	0	0	0	0	0
872	Desulfovibrio	Bacteria	genus	5	0	0	0	5	0	0	0	0
1163	Anabaena	Bacteria	genus	5	0	0	5	0	0	0	0	0
182639	Kribbella	Bacteria	genus	5	5	0	0	0	0	0	0	0
291183	Lacinutrix	Bacteria	genus	5	0	0	0	5	0	0	0	0
194924	Desulfovibrionaceae	Bacteria	family	5	0	0	0	5	0	0	0	0
28221	Deltaproteobacteria	Bacteria	class	5	0	0	0	5	0	0	0	0
239	Flavobacterium sp.	Bacteria	species	4	4	0	0	0	0	0	0	0
46429	Sphingobium chlorophenolicum	Bacteria	species	4	4	0	0	0	0	0	0	0
85683	Bacillus selenitireducens	Bacteria	species	4	0	0	0	0	0	0	0	4
85698	Achromobacter xylosoxidans	Bacteria	species	4	0	0	0	4	0	0	0	0
743722	Sphingobacterium sp. 21	Bacteria	species	4	4	0	0	0	0	0	0	0
439292	Bacillus selenitireducens MLS10	Bacteria	no rank	4	0	0	0	0	0	0	0	4
690566	Sphingobium chlorophenolicum L-1	Bacteria	no rank	4	4	0	0	0	0	0	0	0
693974	Shewanella baltica BA175	Bacteria	no rank	4	0	4	0	0	0	0	0	0
762376	Achromobacter xylosoxidans A8	Bacteria	no rank	4	0	0	0	4	0	0	0	0
258847	rhizosphere bacterium GWR08	Bacteria	species	3	0	3	0	0	0	0	0	0
2323	unclassified Bacteria	Bacteria	no rank	3	0	3	0	0	0	0	0	0
49928	unclassified Bacteria (miscellaneous)	Bacteria	no rank	3	0	3	0	0	0	0	0	0
921	Starkeya novella	Bacteria	species	2	0	0	0	0	0	0	2	0
639283	Starkeya novella DSM 506	Bacteria	no rank	2	0	0	0	0	0	0	2	0
152053	Starkeya	Bacteria	genus	2	0	0	0	0	0	0	2	0
335928	Xanthobacteraceae	Bacteria	family	2	0	0	0	0	0	0	2	0

## Sheet: all_reads
#id	name	kingdom	rank	total	LIB001	LIB003	LIB007	LIB008	LIB009	LIB010	LIB024	LIB025
167561	Larix gmelinii var. principis-rupprechtii	Eukaryota	varietas	18	0	18	0	0	0	0	0	0
721789	Potentilleae	Eukaryota	tribe	93	0	93	0	0	0	0	0	0
147389	Triticeae	Eukaryota	tribe	53	0	0	0	0	0	53	0	0
217038	Pyroleae	Eukaryota	tribe	6	0	0	0	0	0	0	0	6
68336	Bacteroidetes/Chlorobi group	Bacteria	superphylum	6747	281	246	974	4460	0	550	121	115
314146	Euarchontoglires	Eukaryota	superorder	4008	253	901	178	1014	222	107	1046	287
6946	Acariformes	Eukaryota	superorder	30	0	0	0	0	0	0	30	0
2	Bacteria	Bacteria	superkingdom	120801	8840	5778	14790	24933	4992	15867	17292	28309
10239	Viruses	Viruses	superkingdom	30259	5787	443	619	0	10907	0	6886	5617
2759	Eukaryota	Eukaryota	superkingdom	6373	446	1476	916	1035	222	160	1575	543
314295	Hominoidea	Eukaryota	superfamily	3410	253	897	178	1014	222	107	497	242
83155	Acaroidea	Eukaryota	superfamily	22	0	0	0	0	0	0	22	0
7776	Gnathostomata	Eukaryota	superclass	4251	253	901	178	1014	222	107	1258	318
1585	Lactobacillus delbrueckii subsp. bulgaricus	Bacteria	subspecies	7627	231	2121	20	3146	0	2109	0	0
29397	Lactobacillus delbrueckii subsp. lactis	Bacteria	subspecies	3326	8	0	0	30	0	3288	0	0
119602	Streptococcus dysgalactiae subsp. equisimilis	Bacteria	subspecies	404	0	0	0	0	0	0	40	364
143388	Fusobacterium necrophorum subsp. necrophorum	Bacteria	subspecies	319	0	0	0	0	0	0	280	39
59736	Leifsonia xyli subsp. xyli	Bacteria	subspecies	200	0	191	0	0	0	9	0	0
147452	Staphylococcus saprophyticus subsp. saprophyticus	Bacteria	subspecies	149	0	0	0	0	0	0	0	149
76856	Fusobacterium nucleatum subsp. nucleatum	Bacteria	subspecies	126	0	0	0	0	0	0	61	65
101019	Fragaria vesca subsp. americana	Eukaryota	subspecies	93	0	93	0	0	0	0	0	0
31965	Clavibacter michiganensis subsp. tessellarius	Bacteria	subspecies	32	0	0	0	0	0	0	0	32
40041	Streptococcus equi subsp. zooepidemicus	Bacteria	subspecies	10	0	0	0	0	0	0	10	0
115117	Desulfovibrio desulfuricans subsp. desulfuricans	Bacteria	subspecies	5	0	0	0	5	0	0	0	0
68525	delta/epsilon subdivisions	Bacteria	subphylum	9276	0	0	7625	5	0	0	560	1086
89593	Craniata	Eukaryota	subphylum	4251	253	901	178	1014	222	107	1258	318
147538	Pezizomycotina	Eukaryota	subphylum	42	0	0	0	0	0	0	23	19
6843	Chelicerata	Eukaryota	subphylum	30	0	0	0	0	0	0	30	0
147537	Saccharomycotina	Eukaryota	subphylum	5	0	0	0	0	0	0	0	5
85006	Micrococcineae	Bacteria	suborder	6889	97	409	1234	121	1567	1838	260	1363
376913	Haplorrhini	Eukaryota	suborder	3414	253	901	178	1014	222	107	497	242
85007	Corynebacterineae	Bacteria	suborder	883	2	26	9	0	0	78	566	202
423054	Eimeriorina	Eukaryota	suborder	738	0	0	738	0	0	0	0	0
85005	Actinomycineae	Bacteria	suborder	624	0	0	0	0	0	0	124	500
33553	Sciurognathi	Eukaryota	suborder	516	0	0	0	0	0	0	516	0
622452	Kineosporiineae	Bacteria	suborder	224	0	0	0	0	0	0	0	224
85010	Pseudonocardineae	Bacteria	suborder	67	0	38	0	0	0	0	29	0
85013	Frankineae	Bacteria	suborder	28	0	0	0	0	0	0	28	0
85009	Propionibacterineae	Bacteria	suborder	19	5	0	0	0	0	0	0	14
85012	Streptosporangineae	Bacteria	suborder	15	0	0	0	0	0	0	15	0
85008	Micromonosporineae	Bacteria	suborder	12	0	0	0	0	0	0	0	12
255727	Coriobacterineae	Bacteria	suborder	12	0	0	12	0	0	0	0	0
451864	Dikarya	Eukaryota	subkingdom	67	0	0	0	0	0	0	33	34
46226	Branhamella	Bacteria	subgenus	1024	0	0	0	0	0	0	302	722
862507	Mus	Eukaryota	subgenus	503	0	0	0	0	0	0	503	0
139271	Pinus	Eukaryota	subgenus	486	185	301	0	0	0	0	0	0
46225	Moraxella	Bacteria	subgenus	213	0	0	0	12	0	0	183	18
207598	Homininae	Eukaryota	subfamily	3410	253	897	178	1014	222	107	497	242
39107	Murinae	Eukaryota	subfamily	516	0	0	0	0	0	0	516	0
171638	Rosoideae	Eukaryota	subfamily	93	0	93	0	0	0	0	0	0
147368	Pooideae	Eukaryota	subfamily	53	0	0	0	0	0	53	0	0
474067	Acarinae	Eukaryota	subfamily	16	0	0	0	0	0	0	16	0
217032	Monotropoideae	Eukaryota	subfamily	6	0	0	0	0	0	0	0	6
474068	Rhizoglyphinae	Eukaryota	subfamily	6	0	0	0	0	0	0	6	0
85003	Actinobacteridae	Bacteria	subclass	9029	104	473	1243	121	1567	2171	1035	2315
71275	rosids	Eukaryota	subclass	131	8	123	0	0	0	0	0	0
4734	commelinids	Eukaryota	subclass	53	0	0	0	0	0	53	0	0
451867	Dothideomycetidae	Eukaryota	subclass	42	0	0	0	0	0	0	23	19
6933	Acari	Eukaryota	subclass	30	0	0	0	0	0	0	30	0
71274	asterids	Eukaryota	subclass	15	0	0	0	0	0	0	0	15
84998	Coriobacteridae	Bacteria	subclass	12	0	0	12	0	0	0	0	0
452333	Agaricomycetidae	Eukaryota	subclass	2	0	0	0	0	0	0	0	2
578833	Pseudomonas stutzeri subgroup	Bacteria	species subgroup	6	0	6	0	0	0	0	0	0
86661	Bacillus cereus group	Bacteria	species group	5807	3345	7	1025	1424	0	0	0	6
909768	Acinetobacter calcoaceticus/baumannii complex	Bacteria	species group	1795	0	0	0	533	0	1235	0	27
87882	Burkholderia cepacia complex	Bacteria	species group	1014	141	58	11	500	66	238	0	0
119603	Streptococcus dysgalactiae group	Bacteria	species group	696	0	0	0	0	0	0	115	581
136841	Pseudomonas aeruginosa group	Bacteria	species group	689	325	364	0	0	0	0	0	0
136843	Pseudomonas fluorescens group	Bacteria	species group	353	0	0	0	0	0	353	0	0
578822	Methylobacterium extorquens group	Bacteria	species group	191	0	0	0	129	0	62	0	0
111527	pseudomallei group	Bacteria	species group	7	7	0	0	0	0	0	0	0
136846	Pseudomonas stutzeri group	Bacteria	species group	6	0	6	0	0	0	0	0	0
1584	Lactobacillus delbrueckii	Bacteria	species	11395	239	2161	20	3578	0	5397	0	0
138950	Human enterovirus C	Viruses	species	9926	0	0	0	0	0	0	5932	3994
199	Campylobacter concisus	Bacteria	species	8091	0	0	7625	0	0	0	130	336
68887	Torque teno virus	Viruses	species	8090	5704	0	0	0	2386	0	0	0
487	Neisseria meningitidis	Bacteria	species	5440	0	0	0	0	0	0	3062	2378
1396	Bacillus cereus	Bacteria	species	5217	3273	7	832	1105	0	0	0	0
77133	uncultured bacterium	Bacteria	species	4448	0	0	0	0	0	0	2081	2367
932710	TSE-associated circular DNA	Other	species	4332	0	0	0	3131	113	1088	0	0
332412	Chloroplast transformation vector pRvdB1	Other	species	4251	2045	2206	0	0	0	0	0	0
79329	Chitinophaga pinensis	Bacteria	species	4213	37	9	591	3576	0	0	0	0
623	Shigella flexneri	Bacteria	species	4084	929	0	13	3142	0	0	0	0
329	Ralstonia pickettii	Bacteria	species	4027	337	341	0	26	0	3323	0	0
432261	Torque teno midi virus	Viruses	species	3722	0	0	0	0	3722	0	0	0
1270	Micrococcus luteus	Bacteria	species	3467	97	218	1234	78	1567	267	0	6
562	Escherichia coli	Bacteria	species	3301	720	0	1263	0	1318	0	0	0
9606	Homo sapiens	Eukaryota	species	2911	253	788	173	870	222	107	263	235
28035	Staphylococcus lugdunensis	Bacteria	species	2546	0	0	0	2538	0	0	0	8
727	Haemophilus influenzae	Bacteria	species	2058	0	0	0	0	0	0	660	1398
615	Serratia marcescens	Bacteria	species	2041	0	0	0	0	2018	0	23	0
446	Legionella pneumophila	Bacteria	species	1973	0	0	0	1973	0	0	0	0
1280	Staphylococcus aureus	Bacteria	species	1910	18	0	0	1691	0	201	0	0
470	Acinetobacter baumannii	Bacteria	species	1768	0	0	0	533	0	1235	0	0
2033	Microbacterium testaceum	Bacteria	species	1562	0	0	0	0	0	1562	0	0
147711	Human rhinovirus A	Viruses	species	1531	0	0	0	0	0	0	871	660
729	Haemophilus parainfluenzae	Bacteria	species	1512	0	0	0	0	0	0	434	1078
1408	Bacillus pumilus	Bacteria	species	1434	619	3	5	807	0	0	0	0
136966	SEN virus	Viruses	species	1424	0	0	22	0	1402	0	0	0
80869	Acidovorax citrulli	Bacteria	species	1194	0	0	1194	0	0	0	0	0
1282	Staphylococcus epidermidis	Bacteria	species	1186	15	20	0	1151	0	0	0	0
223967	Methylobacterium populi	Bacteria	species	1041	0	0	0	0	0	986	0	55
480	Moraxella catarrhalis	Bacteria	species	1024	0	0	0	0	0	0	302	722
292	Burkholderia cepacia	Bacteria	species	1014	141	58	11	500	66	238	0	0
43675	Rothia mucilaginosa	Bacteria	species	1010	0	0	0	0	0	0	156	854
155900	uncultured organism	Other	species	807	2	0	0	347	0	407	0	51
34073	Variovorax paradoxus	Bacteria	species	788	0	155	0	0	0	633	0	0
404735	uncultured Eimeriidae	Eukaryota	species	738	0	0	738	0	0	0	0	0
715	Actinobacillus pleuropneumoniae	Bacteria	species	725	0	0	0	0	0	0	457	268
287	Pseudomonas aeruginosa	Bacteria	species	689	325	364	0	0	0	0	0	0
234831	Pseudoalteromonas sp. SM9913	Bacteria	species	655	0	0	655	0	0	0	0	0
463676	Human rhinovirus C	Viruses	species	589	0	0	0	0	0	0	0	589
10566	Human papillomavirus	Viruses	species	571	0	0	0	0	571	0	0	0
305	Ralstonia solanacearum	Bacteria	species	553	166	239	116	0	0	32	0	0
1428	Bacillus thuringiensis	Bacteria	species	552	50	0	193	303	0	0	0	6
859	Fusobacterium necrophorum	Bacteria	species	538	0	0	0	0	0	0	486	52
169292	Corynebacterium aurimucosum	Bacteria	species	507	0	0	0	0	0	0	401	106
10090	Mus musculus	Eukaryota	species	503	0	0	0	0	0	0	503	0
3352	Pinus taeda	Eukaryota	species	486	185	301	0	0	0	0	0	0
2047	Rothia dentocariosa	Bacteria	species	474	0	0	0	0	0	0	43	431
44008	Enterococcus cecorum	Bacteria	species	441	0	0	0	0	0	0	195	246
330922	Psychrobacter cryohalolentis	Bacteria	species	432	427	0	5	0	0	0	0	0
12392	Lactobacillus phage mv4	Viruses	species	429	0	0	429	0	0	0	0	0
1334	Streptococcus dysgalactiae	Bacteria	species	404	0	0	0	0	0	0	40	364
1313	Streptococcus pneumoniae	Bacteria	species	389	0	0	0	0	0	0	24	365
325464	uncultured bacterium zdt-25h12	Bacteria	species	359	0	359	0	0	0	0	0	0
409549	ORF selection vector pSOS	Other	species	356	356	0	0	0	0	0	0	0
986	Flavobacterium johnsoniae	Bacteria	species	354	2	3	0	0	0	349	0	0
294	Pseudomonas fluorescens	Bacteria	species	353	0	0	0	0	0	353	0	0
29466	Veillonella parvula	Bacteria	species	353	0	0	0	0	0	0	142	211
486	Neisseria lactamica	Bacteria	species	340	0	0	0	0	0	0	41	299
31998	Methylobacterium radiotolerans	Bacteria	species	328	48	0	0	0	0	64	0	216
60481	Shewanella sp. MR-7	Bacteria	species	322	0	0	322	0	0	0	0	0
381	Mesorhizobium loti	Bacteria	species	313	55	0	15	0	0	157	0	86
204	Campylobacter showae	Bacteria	species	302	0	0	0	0	0	0	302	0
349106	Psychrobacter sp. PRwf-1	Bacteria	species	297	0	0	0	268	0	29	0	0
1336	Streptococcus equi	Bacteria	species	292	0	0	0	0	0	0	75	217
393049	Small anellovirus	Viruses	species	254	0	0	0	0	254	0	0	0
117207	Sphingopyxis alaskensis	Bacteria	species	247	152	65	0	0	0	0	0	30
147712	Human rhinovirus B	Viruses	species	245	0	0	0	0	0	0	0	245
39645	Mesorhizobium ciceri	Bacteria	species	233	0	187	36	10	0	0	0	0
131568	Kineococcus radiotolerans	Bacteria	species	224	0	0	0	0	0	0	0	224
218934	uncultured Campylobacter sp.	Bacteria	species	222	0	0	0	0	0	0	99	123
160791	Sphingomonas wittichii	Bacteria	species	218	0	167	0	21	0	22	0	8
1007105	Pusillimonas sp. T7-7	Bacteria	species	212	0	0	0	212	0	0	0	0
169066	Human rhinovirus sp.	Viruses	species	202	0	0	0	0	0	0	73	129
1575	Leifsonia xyli	Bacteria	species	200	0	191	0	0	0	9	0	0
738	Haemophilus parasuis	Bacteria	species	195	0	0	0	0	0	0	44	151
1660	Actinomyces odontolyticus	Bacteria	species	194	0	0	0	0	0	0	35	159
732	Aggregatibacter aphrophilus	Bacteria	species	192	0	0	0	0	0	0	192	0
408	Methylobacterium extorquens	Bacteria	species	191	0	0	0	129	0	62	0	0
94254	Dyadobacter fermentans	Bacteria	species	183	0	175	8	0	0	0	0	0
386891	Moraxella bovoculi	Bacteria	species	183	0	0	0	0	0	0	183	0
777	Coxiella burnetii	Bacteria	species	174	0	0	0	174	0	0	0	0
742920	Cyclovirus Chimp11	Viruses	species	168	0	0	168	0	0	0	0	0
108	Spirosoma linguale	Bacteria	species	164	0	0	0	0	0	164	0	0
69966	Macrococcus caseolyticus	Bacteria	species	158	0	0	0	0	0	0	57	101
29385	Staphylococcus saprophyticus	Bacteria	species	149	0	0	0	0	0	0	0	149
69823	Selenomonas sputigena	Bacteria	species	148	0	0	0	0	0	0	9	139
259537	Dechloromonas aromatica	Bacteria	species	147	0	0	0	0	0	147	0	0
531844	Flavobacteriaceae bacterium 3519-10	Bacteria	species	135	63	20	35	17	0	0	0	0
851	Fusobacterium nucleatum	Bacteria	species	131	0	0	0	0	0	0	61	70
2350	Haliscomenobacter hydrossis	Bacteria	species	124	7	0	82	35	0	0	0	0
88688	Caulobacter segnis	Bacteria	species	122	0	0	0	0	0	0	0	122
41997	Enterococcus saccharolyticus	Bacteria	species	119	0	0	0	0	0	0	119	0
53399	Hyphomicrobium denitrificans	Bacteria	species	118	0	28	0	0	0	0	5	85
34085	Riemerella anatipestifer	Bacteria	species	113	85	23	5	0	0	0	0	0
100469	Actinomyces canis	Bacteria	species	112	0	0	0	0	0	0	29	83
191579	Fluviicola taffensis	Bacteria	species	110	6	8	96	0	0	0	0	0
199596	Methylocella silvestris	Bacteria	species	108	0	108	0	0	0	0	0	0
504	Kingella kingae	Bacteria	species	105	0	0	0	0	0	0	68	37
57732	Enterococcus asini	Bacteria	species	102	0	0	0	0	0	0	0	102
28264	Arcanobacterium haemolyticum	Bacteria	species	101	0	0	0	0	0	0	30	71
119219	Cupriavidus metallidurans	Bacteria	species	99	9	0	0	0	0	0	0	90
57918	Fragaria vesca	Eukaryota	species	93	0	93	0	0	0	0	0	0
105622	Porphyrobacter sp. KK348	Bacteria	species	91	0	0	0	0	0	0	0	91
39960	Erythrobacter litoralis	Bacteria	species	87	0	0	0	0	0	0	0	87
375	Bradyrhizobium japonicum	Bacteria	species	86	6	70	0	0	10	0	0	0
155892	Caulobacter vibrioides	Bacteria	species	84	0	0	0	0	0	0	6	78
28129	Prevotella denticola	Bacteria	species	80	0	0	0	80	0	0	0	0
83427	uncultured Streptococcus sp.	Bacteria	species	80	0	0	0	0	0	0	0	80
55565	Actinomyces graevenitzii	Bacteria	species	79	0	0	0	0	0	0	0	79
204727	Cloning vector pIA423	Other	species	77	0	0	0	77	0	0	0	0
334207	Human papillomavirus 49	Viruses	species	76	76	0	0	0	0	0	0	0
702113	Novosphingobium sp. PP1Y	Bacteria	species	75	0	0	0	0	0	0	0	75
1772	Mycobacterium smegmatis	Bacteria	species	73	2	0	0	0	0	71	0	0
114707	uncultured Pseudomonas sp.	Bacteria	species	70	0	0	0	0	0	0	0	70
137732	Granulicatella elegans	Bacteria	species	70	0	0	0	0	0	0	0	70
380	Sinorhizobium fredii	Bacteria	species	68	0	68	0	0	0	0	0	0
40324	Stenotrophomonas maltophilia	Bacteria	species	68	0	0	0	57	0	0	0	11
93678	TTV-like mini virus	Viruses	species	67	7	0	0	0	60	0	0	0
9	Buchnera aphidicola	Bacteria	species	66	66	0	0	0	0	0	0	0
1717	Corynebacterium diphtheriae	Bacteria	species	65	0	0	0	0	0	0	43	22
731	Histophilus somni	Bacteria	species	59	0	0	0	59	0	0	0	0
91750	uncultured alpha proteobacterium	Bacteria	species	59	0	0	0	0	0	0	0	59
1288	Staphylococcus xylosus	Bacteria	species	57	0	0	0	0	0	0	0	57
747	Pasteurella multocida	Bacteria	species	56	0	0	0	0	0	0	56	0
1656	Actinomyces viscosus	Bacteria	species	54	0	0	0	0	0	0	19	35
4565	Triticum aestivum	Eukaryota	species	53	0	0	0	0	0	53	0	0
28132	Prevotella melaninogenica	Bacteria	species	52	0	0	0	0	0	0	24	28
316068	Leadbetterella byssophila	Bacteria	species	51	0	0	0	51	0	0	0	0
100716	Chloroherpeton thalassium	Bacteria	species	50	0	0	0	0	0	0	12	38
232721	Acidovorax sp. JS42	Bacteria	species	50	0	0	0	12	6	32	0	0
526645	uncultured bacterium AD12-C5	Bacteria	species	49	0	0	0	0	0	0	0	49
1283	Staphylococcus haemolyticus	Bacteria	species	48	0	0	41	0	0	0	7	0
405	Methylobacillus flagellatus	Bacteria	species	46	46	0	0	0	0	0	0	0
248026	Cupriavidus pinatubonensis	Bacteria	species	45	0	0	0	0	0	0	0	45
290399	Arthrobacter sp. FB24	Bacteria	species	43	0	0	0	43	0	0	0	0
59754	Alcanivorax borkumensis	Bacteria	species	41	0	0	41	0	0	0	0	0
79880	Bacillus clausii	Bacteria	species	41	0	0	0	0	0	0	0	41
84757	Beutenbergia cavernae	Bacteria	species	40	0	0	0	0	0	0	0	40
145656	unknown marine alpha proteobacterium JP57	Bacteria	species	40	0	0	0	0	0	0	0	40
252307	Robiginitalea biformata	Bacteria	species	40	0	0	34	6	0	0	0	0
1076	Rhodopseudomonas palustris	Bacteria	species	38	0	0	0	0	0	0	0	38
40567	Actinosynnema mirum	Bacteria	species	38	0	38	0	0	0	0	0	0
714	Aggregatibacter actinomycetemcomitans	Bacteria	species	35	3	0	0	0	0	0	0	32
28447	Clavibacter michiganensis	Bacteria	species	32	0	0	0	0	0	0	0	32
151895	Pedobacter saltans	Bacteria	species	32	0	0	0	0	0	32	0	0
687373	Torque teno mini virus 5	Viruses	species	32	0	0	0	0	32	0	0	0
68909	Deinococcus geothermalis	Bacteria	species	31	0	0	0	0	0	31	0	0
175245	uncultured fungus	Eukaryota	species	31	0	0	0	0	0	0	0	31
1018	Capnocytophaga ochracea	Bacteria	species	30	0	0	0	0	0	0	30	0
324057	Paenibacillus sp. JDR-2	Bacteria	species	30	0	0	0	0	0	0	0	30
3649	Carica papaya	Eukaryota	species	30	0	30	0	0	0	0	0	0
114616	Methylobacterium nodulans	Bacteria	species	28	0	0	0	0	0	0	0	28
185300	Paludibacter propionicigenes	Bacteria	species	28	0	0	14	14	0	0	0	0
1833	Rhodococcus erythropolis	Bacteria	species	26	0	26	0	0	0	0	0	0
208596	Carnobacterium sp. 17-4	Bacteria	species	26	0	0	0	0	0	0	26	0
1069	Rhodomicrobium vannielii	Bacteria	species	25	0	0	0	0	0	0	25	0
79885	Bacillus pseudofirmus	Bacteria	species	25	0	0	0	0	0	0	25	0
62322	Shewanella baltica	Bacteria	species	24	0	4	0	20	0	0	0	0
1718	Corynebacterium glutamicum	Bacteria	species	23	0	0	0	0	0	0	0	23
48935	Novosphingobium aromaticivorans	Bacteria	species	23	0	23	0	0	0	0	0	0
312306	Pseudomonas entomophila	Bacteria	species	23	23	0	0	0	0	0	0	0
1006	Marivirga tractuosa	Bacteria	species	22	6	0	11	0	0	5	0	0
1014	Weeksella virosa	Bacteria	species	21	0	0	0	0	0	0	0	21
1356	Enterococcus sulfureus	Bacteria	species	21	0	0	0	0	0	0	0	21
1406	Paenibacillus polymyxa	Bacteria	species	21	0	0	0	0	0	0	0	21
1852	Saccharomonospora viridis	Bacteria	species	21	0	0	0	0	0	0	21	0
3067	Volvox carteri	Eukaryota	species	21	0	0	0	21	0	0	0	0
471	Acinetobacter calcoaceticus	Bacteria	species	20	0	0	0	0	0	0	0	20
1658	Actinomyces bovis	Bacteria	species	20	0	0	0	0	0	0	11	9
45610	Psychrobacter urativorans	Bacteria	species	20	0	0	20	0	0	0	0	0
964	Herbaspirillum seropedicae	Bacteria	species	19	0	19	0	0	0	0	0	0
152509	uncultured Bacteroidetes bacterium	Bacteria	species	19	0	0	0	0	0	0	19	0
607712	Neisseria shayeganii	Bacteria	species	19	0	0	0	0	0	0	19	0
9598	Pan troglodytes	Eukaryota	species	19	0	19	0	0	0	0	0	0
478	Moraxella nonliquefaciens	Bacteria	species	18	0	0	0	0	0	0	0	18
332056	Sphingobium japonicum	Bacteria	species	18	0	18	0	0	0	0	0	0
123599	Larix gmelinii	Eukaryota	species	18	0	18	0	0	0	0	0	0
38289	Corynebacterium jeikeium	Bacteria	species	17	0	0	0	0	0	0	0	17
56193	Sphingobium chungbukense	Bacteria	species	17	0	0	0	0	0	0	0	17
1405	Bacillus mycoides	Bacteria	species	16	16	0	0	0	0	0	0	0
152794	Corynebacterium efficiens	Bacteria	species	16	0	0	0	0	0	0	0	16
157673	Mannheimia succiniciproducens	Bacteria	species	16	0	0	0	0	0	0	0	16
364317	Verminephrobacter eiseniae	Bacteria	species	16	0	16	0	0	0	0	0	0
751585	Coprococcus sp. ART55/1	Bacteria	species	16	0	0	0	0	0	0	16	0
1502	Clostridium perfringens	Bacteria	species	15	0	0	0	0	0	0	0	15
2021	Thermobifida fusca	Bacteria	species	15	0	0	0	0	0	0	15	0
238	Elizabethkingia meningoseptica	Bacteria	species	14	14	0	0	0	0	0	0	0
913	Nitrobacter winogradskyi	Bacteria	species	14	0	0	0	0	0	0	0	14
196162	Nocardioides sp. JS614	Bacteria	species	14	0	0	0	0	0	0	0	14
622	Shigella dysenteriae	Bacteria	species	13	0	13	0	0	0	0	0	0
984	Pedobacter heparinus	Bacteria	species	13	5	8	0	0	0	0	0	0
134605	Fusobacterium equinum	Bacteria	species	13	0	0	0	0	0	0	0	13
204038	Dickeya dadantii	Bacteria	species	13	0	13	0	0	0	0	0	0
386487	Candidatus Ruthia magnifica	Bacteria	species	13	0	0	9	4	0	0	0	0
713033	Synergistetes bacterium oral taxon 359	Bacteria	species	13	0	0	0	0	0	0	13	0
983548	Krokinobacter sp. 4H-3-7-5	Bacteria	species	13	13	0	0	0	0	0	0	0
10116	Rattus norvegicus	Eukaryota	species	13	0	0	0	0	0	0	13	0
158	Treponema denticola	Bacteria	species	12	0	0	0	0	0	0	12	0
1493	Clostridium cellulovorans	Bacteria	species	12	0	0	0	0	0	0	12	0
28151	Serratia proteamaculans	Bacteria	species	12	0	12	0	0	0	0	0	0
32046	Synechococcus elongatus	Bacteria	species	12	0	0	12	0	0	0	0	0
77152	Moraxella sp. TA144	Bacteria	species	12	0	0	0	12	0	0	0	0
84112	Eggerthella lenta	Bacteria	species	12	0	0	12	0	0	0	0	0
86027	uncultured beta proteobacterium	Bacteria	species	12	0	0	0	0	0	0	0	12
381796	uncultured endolithic bacterium	Bacteria	species	12	0	0	0	0	0	0	0	12
690129	Chryseobacterium sp. N28	Bacteria	species	12	12	0	0	0	0	0	0	0
795830	Candidatus Brocadia sinica	Bacteria	species	12	0	0	0	0	0	0	0	12
28111	Bacteroides eggerthii	Bacteria	species	11	0	0	0	0	0	0	11	0
40542	Leptotrichia buccalis	Bacteria	species	11	0	0	0	0	0	0	11	0
163581	Leptotrichia sp. oral clone DR011	Bacteria	species	11	0	0	0	0	0	0	11	0
204773	Herminiimonas arsenicoxydans	Bacteria	species	11	0	11	0	0	0	0	0	0
375286	Janthinobacterium sp. Marseille	Bacteria	species	11	0	11	0	0	0	0	0	0
376805	Bacteroides salanitronis	Bacteria	species	11	0	0	0	0	0	0	11	0
32630	synthetic construct	Other	species	11	0	0	0	0	0	0	0	11
1409	Bacillus sp.	Bacteria	species	10	0	0	0	0	0	0	10	0
37329	Nocardia farcinica	Bacteria	species	10	0	0	0	0	0	0	0	10
96345	Flavobacterium psychrophilum	Bacteria	species	10	10	0	0	0	0	0	0	0
266779	Chelativorans sp. BNC1	Bacteria	species	10	0	10	0	0	0	0	0	0
175243	uncultured Ascomycota	Eukaryota	species	10	0	0	0	0	0	0	10	0
1063	Rhodobacter sphaeroides	Bacteria	species	9	0	0	9	0	0	0	0	0
47850	Micromonospora aurantiaca	Bacteria	species	9	0	0	0	0	0	0	0	9
88805	uncultured bacterium NIC030	Bacteria	species	9	0	0	0	0	0	0	0	9
256618	Parvibaculum lavamentivorans	Bacteria	species	9	0	0	0	9	0	0	0	0
387092	Nitratiruptor sp. SB155-2	Bacteria	species	9	0	0	0	0	0	0	0	9
639313	Amycolicicoccus subflavus	Bacteria	species	9	0	0	0	0	0	0	9	0
39353	Paulownia tomentosa	Eukaryota	species	9	0	0	0	0	0	0	0	9
1836	Saccharopolyspora erythraea	Bacteria	species	8	0	0	0	0	0	0	8	0
330214	Candidatus Nitrospira defluvii	Bacteria	species	8	0	0	0	8	0	0	0	0
354471	Bergeyella sp. AF14	Bacteria	species	8	0	0	0	0	0	0	0	8
398743	Zunongwangia profunda	Bacteria	species	8	2	0	0	6	0	0	0	0
640510	Burkholderia sp. CCGE1001	Bacteria	species	8	0	8	0	0	0	0	0	0
710992	uncultured Sphingobacterium sp. EB080_L08E11	Bacteria	species	8	0	0	0	0	0	0	0	8
29918	Davidiella tassiana	Eukaryota	species	8	0	0	0	0	0	0	0	8
447310	Begonia x tuberhybrida	Eukaryota	species	8	8	0	0	0	0	0	0	0
546345	Acantholichen pannarioides	Eukaryota	species	8	0	0	0	0	0	0	0	8
288	Pseudoalteromonas atlantica	Bacteria	species	7	0	0	0	7	0	0	0	0
1311	Streptococcus agalactiae	Bacteria	species	7	0	7	0	0	0	0	0	0
28037	Streptococcus mitis	Bacteria	species	7	0	0	0	0	7	0	0	0
28450	Burkholderia pseudomallei	Bacteria	species	7	7	0	0	0	0	0	0	0
80866	Delftia acidovorans	Bacteria	species	7	0	0	0	7	0	0	0	0
110539	Mycobacterium vanbaalenii	Bacteria	species	7	0	0	0	0	0	7	0	0
164546	Cupriavidus taiwanensis	Bacteria	species	7	0	0	0	0	0	0	0	7
175642	Leptotrichia sp. oral clone FP036	Bacteria	species	7	0	0	0	0	0	0	7	0
212695	uncultured Flavobacteria bacterium	Bacteria	species	7	0	0	7	0	0	0	0	0
316	Pseudomonas stutzeri	Bacteria	species	6	0	6	0	0	0	0	0	0
358	Agrobacterium tumefaciens	Bacteria	species	6	0	0	0	0	0	6	0	0
536	Chromobacterium violaceum	Bacteria	species	6	0	0	0	6	0	0	0	0
985	Cytophaga hutchinsonii	Bacteria	species	6	0	0	0	6	0	0	0	0
1246	Leuconostoc lactis	Bacteria	species	6	0	0	0	0	0	0	0	6
28141	Cronobacter sakazakii	Bacteria	species	6	0	0	0	0	0	6	0	0
33945	Enterococcus avium	Bacteria	species	6	0	0	0	0	0	0	0	6
65393	Cyanothece sp. PCC 7424	Bacteria	species	6	0	0	0	0	0	0	0	6
167972	uncultured Enterococcus sp.	Bacteria	species	6	0	0	0	0	0	0	0	6
471223	Geobacillus sp. WCH70	Bacteria	species	6	0	0	0	0	0	0	0	6
709797	Bradyrhizobiaceae bacterium SG-6C	Bacteria	species	6	0	0	0	0	0	0	0	6
59818	Tyrophagus putrescentiae	Eukaryota	species	6	0	0	0	0	0	0	6	0
93815	Chimaphila umbellata	Eukaryota	species	6	0	0	0	0	0	0	0	6
876	Desulfovibrio desulfuricans	Bacteria	species	5	0	0	0	5	0	0	0	0
1172	Anabaena variabilis	Bacteria	species	5	0	0	5	0	0	0	0	0
1542	Clostridium novyi	Bacteria	species	5	0	0	0	5	0	0	0	0
182640	Kribbella flavida	Bacteria	species	5	5	0	0	0	0	0	0	0
182690	uncultured Achromobacter sp.	Bacteria	species	5	0	0	0	0	0	0	5	0
983544	Lacinutrix sp. 5H-3-7-4	Bacteria	species	5	0	0	0	5	0	0	0	0
273371	Candida orthopsilosis	Eukaryota	species	5	0	0	0	0	0	0	0	5
646413	Streptococcus phage 5093	Viruses	species	5	0	0	0	0	5	0	0	0
239	Flavobacterium sp.	Bacteria	species	4	4	0	0	0	0	0	0	0
46429	Sphingobium chlorophenolicum	Bacteria	species	4	4	0	0	0	0	0	0	0
85683	Bacillus selenitireducens	Bacteria	species	4	0	0	0	0	0	0	0	4
85698	Achromobacter xylosoxidans	Bacteria	species	4	0	0	0	4	0	0	0	0
743722	Sphingobacterium sp. 21	Bacteria	species	4	4	0	0	0	0	0	0	0
258847	rhizosphere bacterium GWR08	Bacteria	species	3	0	3	0	0	0	0	0	0
921	Starkeya novella	Bacteria	species	2	0	0	0	0	0	0	2	0
1224	Proteobacteria	Bacteria	phylum	54469	3535	2294	11435	7190	3418	7443	8141	11013
1239	Firmicutes	Bacteria	phylum	30460	4236	2198	1091	12309	7	5601	1385	3633
201174	Actinobacteria	Bacteria	phylum	9041	104	473	1255	121	1567	2171	1035	2315
976	Bacteroidetes	Bacteria	phylum	6697	281	246	974	4460	0	550	109	77
7711	Chordata	Eukaryota	phylum	4251	253	901	178	1014	222	107	1258	318
35493	Streptophyta	Eukaryota	phylum	836	193	575	0	0	0	53	0	15
32066	Fusobacteria	Bacteria	phylum	806	0	0	0	0	0	0	652	154
5794	Apicomplexa	Eukaryota	phylum	738	0	0	738	0	0	0	0	0
1117	Cyanobacteria	Bacteria	phylum	443	0	0	17	420	0	0	0	6
4890	Ascomycota	Eukaryota	phylum	57	0	0	0	0	0	0	33	24
1090	Chlorobi	Bacteria	phylum	50	0	0	0	0	0	0	12	38
1297	Deinococcus-Thermus	Bacteria	phylum	31	0	0	0	0	0	31	0	0
6656	Arthropoda	Eukaryota	phylum	30	0	0	0	0	0	0	30	0
508458	Synergistetes	Bacteria	phylum	21	0	0	0	0	0	0	21	0
3041	Chlorophyta	Eukaryota	phylum	21	0	0	0	21	0	0	0	0
203691	Spirochaetes	Bacteria	phylum	19	0	0	0	0	0	0	12	7
203682	Planctomycetes	Bacteria	phylum	12	0	0	0	0	0	0	0	12
5204	Basidiomycota	Eukaryota	phylum	10	0	0	0	0	0	0	0	10
40117	Nitrospirae	Bacteria	phylum	8	0	0	0	8	0	0	0	0
544448	Tenericutes	Bacteria	phylum	8	0	0	0	0	0	0	8	0
9526	Catarrhini	Eukaryota	parvorder	3414	253	901	178	1014	222	107	497	242
186826	Lactobacillales	Bacteria	order	15893	239	2168	20	4379	7	5397	923	2760
1385	Bacillales	Bacteria	order	13929	3997	30	1071	7925	0	204	194	508
464095	Picornavirales	Viruses	order	12503	0	0	0	0	0	0	6886	5617
91347	Enterobacteriales	Bacteria	order	9949	1786	268	1377	3142	3336	6	34	0
213849	Campylobacterales	Bacteria	order	9262	0	0	7625	0	0	0	560	1077
2037	Actinomycetales	Bacteria	order	9029	104	473	1243	121	1567	2171	1035	2315
80840	Burkholderiales	Bacteria	order	8182	660	858	1321	761	72	4258	57	195
206351	Neisseriales	Bacteria	order	7394	0	0	0	6	0	0	4004	3384
135625	Pasteurellales	Bacteria	order	6558	3	0	0	59	0	0	2813	3683
72274	Pseudomonadales	Bacteria	order	5161	775	370	25	813	0	1617	596	965
200666	Sphingobacteriales	Bacteria	order	4415	53	17	694	3611	0	32	0	8
9443	Primates	Eukaryota	order	3414	253	901	178	1014	222	107	497	242
356	Rhizobiales	Bacteria	order	3022	109	518	51	148	10	1393	37	756
118969	Legionellales	Bacteria	order	2147	0	0	0	2147	0	0	0	0
135622	Alteromonadales	Bacteria	order	1008	0	4	977	27	0	0	0	0
200644	Flavobacteriales	Bacteria	order	891	211	54	170	34	0	349	44	29
204457	Sphingomonadales	Bacteria	order	812	156	276	0	21	0	22	6	331
203491	Fusobacteriales	Bacteria	order	806	0	0	0	0	0	0	652	154
75739	Eucoccidiorida	Eukaryota	order	738	0	0	738	0	0	0	0	0
3313	Coniferales	Eukaryota	order	637	185	452	0	0	0	0	0	0
9989	Rodentia	Eukaryota	order	516	0	0	0	0	0	0	516	0
909929	Selenomonadales	Bacteria	order	501	0	0	0	0	0	0	151	350
768507	Cytophagales	Bacteria	order	426	6	175	19	57	0	169	0	0
1161	Nostocales	Bacteria	order	425	0	0	5	420	0	0	0	0
204458	Caulobacterales	Bacteria	order	259	0	0	0	0	0	0	29	230
171549	Bacteroidales	Bacteria	order	182	0	0	14	94	0	0	46	28
206389	Rhodocyclales	Bacteria	order	147	0	0	0	0	0	147	0	0
3744	Rosales	Eukaryota	order	93	0	93	0	0	0	0	0	0
135614	Xanthomonadales	Bacteria	order	68	0	0	0	57	0	0	0	11
38820	Poales	Eukaryota	order	53	0	0	0	0	0	53	0	0
191411	Chlorobiales	Bacteria	order	50	0	0	0	0	0	0	12	38
186802	Clostridiales	Bacteria	order	48	0	0	0	5	0	0	28	15
206350	Methylophilales	Bacteria	order	46	46	0	0	0	0	0	0	0
134362	Capnodiales	Eukaryota	order	42	0	0	0	0	0	0	23	19
135619	Oceanospirillales	Bacteria	order	41	0	0	41	0	0	0	0	0
118964	Deinococcales	Bacteria	order	31	0	0	0	0	0	31	0	0
3699	Brassicales	Eukaryota	order	30	0	30	0	0	0	0	0	0
6951	Astigmata	Eukaryota	order	30	0	0	0	0	0	0	30	0
3042	Chlamydomonadales	Eukaryota	order	21	0	0	0	21	0	0	0	0
136	Spirochaetales	Bacteria	order	19	0	0	0	0	0	0	12	7
1118	Chroococcales	Bacteria	order	18	0	0	12	0	0	0	0	6
112	Planctomycetales	Bacteria	order	12	0	0	0	0	0	0	0	12
84999	Coriobacteriales	Bacteria	order	12	0	0	12	0	0	0	0	0
204455	Rhodobacterales	Bacteria	order	9	0	0	9	0	0	0	0	0
4143	Lamiales	Eukaryota	order	9	0	0	0	0	0	0	0	9
2085	Mycoplasmatales	Bacteria	order	8	0	0	0	0	0	0	8	0
189778	Nitrospirales	Bacteria	order	8	0	0	0	8	0	0	0	0
71239	Cucurbitales	Eukaryota	order	8	8	0	0	0	0	0	0	0
452338	Corticiales	Eukaryota	order	8	0	0	0	0	0	0	0	8
41945	Ericales	Eukaryota	order	6	0	0	0	0	0	0	0	6
213115	Desulfovibrionales	Bacteria	order	5	0	0	0	5	0	0	0	0
4892	Saccharomycetales	Eukaryota	order	5	0	0	0	0	0	0	0	5
28883	Caudovirales	Viruses	order	5	0	0	0	0	5	0	0	0
5338	Agaricales	Eukaryota	order	2	0	0	0	0	0	0	0	2
0	unknown	Other	no rank	1870240	202740	267978	181620	179480	316846	377603	173582	170391
1	root	Other	no rank	169880	18494	9903	16346	29523	16427	17522	26310	35355
131567	cellular organisms	Other	no rank	128017	9286	7254	15716	25968	5214	16027	19387	29165
29258	ssDNA viruses	Viruses	no rank	16232	5711	0	190	0	10331	0	0	0
363628	unclassified Anelloviridae	Viruses	no rank	13557	5711	0	22	0	7824	0	0	0
35278	ssRNA positive-strand viruses, no DNA stage	Viruses	no rank	12503	0	0	0	0	0	0	6886	5617
439488	ssRNA viruses	Viruses	no rank	12503	0	0	0	0	0	0	6886	5617
861519	Human enterovirus 109	Viruses	no rank	9910	0	0	0	0	0	0	5932	3978
360104	Campylobacter concisus 13826	Bacteria	no rank	7737	0	0	7625	0	0	0	22	90
12908	unclassified sequences	Other	no rank	5139	2	0	0	3478	113	1495	0	51
48479	environmental samples	Bacteria	no rank	4884	0	359	0	0	0	0	2081	2444
28384	other sequences	Other	no rank	4721	2401	2206	0	77	0	0	0	37
81077	artificial sequences	Other	no rank	4721	2401	2206	0	77	0	0	0	37
29278	vectors	Other	no rank	4684	2401	2206	0	77	0	0	0	0
33154	Fungi/Metazoa group	Eukaryota	no rank	4595	253	901	178	1014	222	107	1516	404
6072	Eumetazoa	Eukaryota	no rank	4451	253	901	178	1014	222	107	1458	318
33213	Bilateria	Eukaryota	no rank	4451	253	901	178	1014	222	107	1458	318
767455	Lactobacillus delbrueckii subsp. bulgaricus ND02	Bacteria	no rank	4390	219	1513	20	2087	0	551	0	0
33316	Coelomata	Eukaryota	no rank	4281	253	901	178	1014	222	107	1288	318
7742	Vertebrata	Eukaryota	no rank	4251	253	901	178	1014	222	107	1258	318
8287	Sarcopterygii	Eukaryota	no rank	4251	253	901	178	1014	222	107	1258	318
32523	Tetrapoda	Eukaryota	no rank	4251	253	901	178	1014	222	107	1258	318
33511	Deuterostomia	Eukaryota	no rank	4251	253	901	178	1014	222	107	1258	318
117570	Teleostomi	Eukaryota	no rank	4251	253	901	178	1014	222	107	1258	318
117571	Euteleostomi	Eukaryota	no rank	4251	253	901	178	1014	222	107	1258	318
32524	Amniota	Eukaryota	no rank	4226	253	901	178	1014	222	107	1233	318
485918	Chitinophaga pinensis DSM 2588	Bacteria	no rank	4213	37	9	591	3576	0	0	0	0
563835	Chitinophagaceae	Bacteria	no rank	4213	37	9	591	3576	0	0	0	0
9347	Eutheria	Eukaryota	no rank	4195	253	901	178	1014	222	107	1233	287
32525	Theria	Eukaryota	no rank	4195	253	901	178	1014	222	107	1233	287
402626	Ralstonia pickettii 12J	Bacteria	no rank	3154	74	164	0	0	0	2916	0	0
443974	TT virus sle	Viruses	no rank	2084	1865	0	0	0	219	0	0	0
297246	Legionella pneumophila str. Paris	Bacteria	no rank	1973	0	0	0	1973	0	0	0	0
443975	TT virus sle1957	Viruses	no rank	1865	1865	0	0	0	0	0	0	0
167758	TTV-like virus DXL1	Viruses	no rank	1615	0	0	0	0	1615	0	0	0
979556	Microbacterium testaceum StLB037	Bacteria	no rank	1562	0	0	0	0	0	1562	0	0
862965	Haemophilus parainfluenzae T3T1	Bacteria	no rank	1512	0	0	0	0	0	0	434	1078
397945	Acidovorax citrulli AAC00-1	Bacteria	no rank	1194	0	0	1194	0	0	0	0	0
35237	dsDNA viruses, no RNA stage	Viruses	no rank	1095	76	443	0	0	576	0	0	0
441620	Methylobacterium populi BJ001	Bacteria	no rank	1041	0	0	0	0	0	986	0	55
680646	Rothia mucilaginosa DY-18	Bacteria	no rank	1010	0	0	0	0	0	0	156	854
591020	Shigella flexneri 2002017	Bacteria	no rank	919	919	0	0	0	0	0	0	0
315750	Bacillus pumilus SAFR-032	Bacteria	no rank	914	619	3	5	287	0	0	0	0
185928	Human rhinovirus 73	Viruses	no rank	891	0	0	0	0	0	0	281	610
3193	Embryophyta	Eukaryota	no rank	836	193	575	0	0	0	53	0	15
58023	Tracheophyta	Eukaryota	no rank	836	193	575	0	0	0	53	0	15
58024	Spermatophyta	Eukaryota	no rank	836	193	575	0	0	0	53	0	15
78536	Euphyllophyta	Eukaryota	no rank	836	193	575	0	0	0	53	0	15
131221	Streptophytina	Eukaryota	no rank	836	193	575	0	0	0	53	0	15
151659	environmental samples	Other	no rank	807	2	0	0	347	0	407	0	51
749219	Moraxella catarrhalis RH4	Bacteria	no rank	761	0	0	0	0	0	0	302	459
33630	Alveolata	Eukaryota	no rank	738	0	0	738	0	0	0	0	0
404734	environmental samples	Eukaryota	no rank	738	0	0	738	0	0	0	0	0
428406	Ralstonia pickettii 12D	Bacteria	no rank	643	87	123	0	26	0	407	0	0
3312	Coniferophyta	Eukaryota	no rank	637	185	452	0	0	0	0	0	0
595537	Variovorax paradoxus EPS	Bacteria	no rank	633	0	0	0	0	0	633	0	0
935599	Neisseria meningitidis G2136	Bacteria	no rank	581	0	0	0	0	0	0	0	581
173087	Human papillomavirus types	Viruses	no rank	571	0	0	0	0	571	0	0	0
333774	unclassified Papillomaviridae	Viruses	no rank	571	0	0	0	0	571	0	0	0
509173	Acinetobacter baumannii AYE	Bacteria	no rank	533	0	0	0	533	0	0	0	0
541229	Bacillus thuringiensis serovar chinensis CT-43	Bacteria	no rank	532	36	0	193	303	0	0	0	0
1001229	Bacillus thuringiensis serovar chinensis	Bacteria	no rank	532	36	0	193	303	0	0	0	0
314147	Glires	Eukaryota	no rank	516	0	0	0	0	0	0	516	0
337687	Muroidea	Eukaryota	no rank	516	0	0	0	0	0	0	516	0
548476	Corynebacterium aurimucosum ATCC 700975	Bacteria	no rank	507	0	0	0	0	0	0	401	106
762948	Rothia dentocariosa ATCC 17931	Bacteria	no rank	474	0	0	0	0	0	0	43	431
335284	Psychrobacter cryohalolentis K5	Bacteria	no rank	432	427	0	5	0	0	0	0	0
12333	unclassified phages	Viruses	no rank	429	0	0	429	0	0	0	0	0
486410	Streptococcus dysgalactiae subsp. equisimilis GGS_124	Bacteria	no rank	404	0	0	0	0	0	0	40	364
376686	Flavobacterium johnsoniae UW101	Bacteria	no rank	354	2	3	0	0	0	349	0	0
216595	Pseudomonas fluorescens SBW25	Bacteria	no rank	353	0	0	0	0	0	353	0	0
479436	Veillonella parvula DSM 2008	Bacteria	no rank	353	0	0	0	0	0	0	142	211
185946	Human rhinovirus 100	Viruses	no rank	347	0	0	0	0	0	0	342	5
489653	Neisseria lactamica 020-06	Bacteria	no rank	340	0	0	0	0	0	0	41	299
426355	Methylobacterium radiotolerans JCM 2831	Bacteria	no rank	328	48	0	0	0	0	64	0	216
353496	Lactobacillus delbrueckii subsp. bulgaricus 2038	Bacteria	no rank	325	0	0	0	0	0	325	0	0
135720	Neisseria meningitidis serogroup C	Bacteria	no rank	258	0	0	0	0	0	0	237	21
374833	Neisseria meningitidis 053442	Bacteria	no rank	258	0	0	0	0	0	0	237	21
317655	Sphingopyxis alaskensis RB2256	Bacteria	no rank	247	152	65	0	0	0	0	0	30
44131	Human rhinovirus 49	Viruses	no rank	242	0	0	0	0	0	0	242	0
267608	Ralstonia solanacearum GMI1000	Bacteria	no rank	233	0	233	0	0	0	0	0	0
278148	Mesorhizobium ciceri biovar biserrulae	Bacteria	no rank	233	0	187	36	10	0	0	0	0
765698	Mesorhizobium ciceri biovar biserrulae WSM1271	Bacteria	no rank	233	0	187	36	10	0	0	0	0
266835	Mesorhizobium loti MAFF303099	Bacteria	no rank	227	55	0	15	0	0	157	0	0
266940	Kineococcus radiotolerans SRS30216	Bacteria	no rank	224	0	0	0	0	0	0	0	224
134209	environmental samples	Bacteria	no rank	222	0	0	0	0	0	0	99	123
444020	TT virus sle2143	Viruses	no rank	219	0	0	0	0	219	0	0	0
392499	Sphingomonas wittichii RW1	Bacteria	no rank	218	0	167	0	21	0	22	0	8
348531	unclassified Rhinovirus	Viruses	no rank	202	0	0	0	0	0	0	73	129
281090	Leifsonia xyli subsp. xyli str. CTCB07	Bacteria	no rank	200	0	191	0	0	0	9	0	0
3398	Magnoliophyta	Eukaryota	no rank	199	8	123	0	0	0	53	0	15
634176	Aggregatibacter aphrophilus NJ8700	Bacteria	no rank	192	0	0	0	0	0	0	192	0
471854	Dyadobacter fermentans DSM 18053	Bacteria	no rank	183	0	175	8	0	0	0	0	0
743974	Moraxella bovoculi 237	Bacteria	no rank	183	0	0	0	0	0	0	183	0
642248	unclassified Circoviridae	Viruses	no rank	168	0	0	168	0	0	0	0	0
742914	suggested genus Cyclovirus	Viruses	no rank	168	0	0	168	0	0	0	0	0
504472	Spirosoma linguale DSM 74	Bacteria	no rank	164	0	0	0	0	0	164	0	0
458233	Macrococcus caseolyticus JCSC5402	Bacteria	no rank	158	0	0	0	0	0	0	57	101
342451	Staphylococcus saprophyticus subsp. saprophyticus ATCC 15305	Bacteria	no rank	149	0	0	0	0	0	0	0	149
546271	Selenomonas sputigena ATCC 35185	Bacteria	no rank	148	0	0	0	0	0	0	9	139
159087	Dechloromonas aromatica RCB	Bacteria	no rank	147	0	0	0	0	0	147	0	0
71240	eudicotyledons	Eukaryota	no rank	146	8	123	0	0	0	0	0	15
91827	core eudicotyledons	Eukaryota	no rank	146	8	123	0	0	0	0	0	15
262728	Haemophilus influenzae R2866	Bacteria	no rank	139	0	0	0	0	0	0	139	0
167325	Human rhinovirus 91	Viruses	no rank	137	0	0	0	0	0	0	0	137
61432	unclassified Flavobacteriaceae	Bacteria	no rank	135	63	20	35	17	0	0	0	0
272630	Methylobacterium extorquens AM1	Bacteria	no rank	129	0	0	0	129	0	0	0	0
190304	Fusobacterium nucleatum subsp. nucleatum ATCC 25586	Bacteria	no rank	126	0	0	0	0	0	0	61	65
760192	Haliscomenobacter hydrossis DSM 1100	Bacteria	no rank	124	7	0	82	35	0	0	0	0
509190	Caulobacter segnis ATCC 21756	Bacteria	no rank	122	0	0	0	0	0	0	0	122
582899	Hyphomicrobium denitrificans ATCC 51888	Bacteria	no rank	118	0	28	0	0	0	0	5	85
1031711	Ralstonia solanacearum Po82	Bacteria	no rank	116	0	0	116	0	0	0	0	0
83333	Escherichia coli K-12	Bacteria	no rank	111	0	0	111	0	0	0	0	0
755732	Fluviicola taffensis DSM 16823	Bacteria	no rank	110	6	8	96	0	0	0	0	0
395965	Methylocella silvestris BL2	Bacteria	no rank	108	0	108	0	0	0	0	0	0
887327	Kingella kingae ATCC 23330	Bacteria	no rank	105	0	0	0	0	0	0	68	37
644284	Arcanobacterium haemolyticum DSM 20595	Bacteria	no rank	101	0	0	0	0	0	0	30	71
91835	fabids	Eukaryota	no rank	101	8	93	0	0	0	0	0	0
935897	Haemophilus influenzae F3047	Bacteria	no rank	100	0	0	0	0	0	0	0	100
266264	Cupriavidus metallidurans CH34	Bacteria	no rank	99	9	0	0	0	0	0	0	90
859657	Ralstonia solanacearum PSI07	Bacteria	no rank	94	68	0	0	0	0	26	0	0
721787	Rosodae	Eukaryota	no rank	93	0	93	0	0	0	0	0	0
516950	Streptococcus pneumoniae CGSP14	Bacteria	no rank	91	0	0	0	0	0	0	0	91
314225	Erythrobacter litoralis HTCC2594	Bacteria	no rank	87	0	0	0	0	0	0	0	87
224911	Bradyrhizobium japonicum USDA 110	Bacteria	no rank	86	6	70	0	0	10	0	0	0
190650	Caulobacter crescentus CB15	Bacteria	no rank	84	0	0	0	0	0	0	6	78
565050	Caulobacter crescentus NA1000	Bacteria	no rank	84	0	0	0	0	0	0	6	78
83426	environmental samples	Bacteria	no rank	80	0	0	0	0	0	0	0	80
767031	Prevotella denticola F0289	Bacteria	no rank	80	0	0	0	80	0	0	0	0
10616	Human papillomavirus type 49	Viruses	no rank	76	76	0	0	0	0	0	0	0
246196	Mycobacterium smegmatis str. MC2 155	Bacteria	no rank	73	2	0	0	0	0	71	0	0
62104	environmental samples	Bacteria	no rank	70	0	0	0	0	0	0	0	70
626369	Granulicatella elegans ATCC 700633	Bacteria	no rank	70	0	0	0	0	0	0	0	70
693978	Riemerella anatipestifer DSM 15868	Bacteria	no rank	69	46	23	0	0	0	0	0	0
394	Sinorhizobium fredii NGR234	Bacteria	no rank	68	0	68	0	0	0	0	0	0
227292	Sinorhizobium/Ensifer group	Bacteria	no rank	68	0	68	0	0	0	0	0	0
663276	Sinorhizobium fredii group	Bacteria	no rank	68	0	68	0	0	0	0	0	0
995085	Stenotrophomonas maltophilia group	Bacteria	no rank	68	0	0	0	57	0	0	0	11
661410	Methylobacterium extorquens DM4	Bacteria	no rank	62	0	0	0	0	0	62	0	0
227290	Rhizobium/Agrobacterium group	Bacteria	no rank	60	0	0	0	0	0	6	5	49
47925	environmental samples	Bacteria	no rank	59	0	0	0	0	0	0	0	59
205914	Haemophilus somnus 129PT	Bacteria	no rank	59	0	0	0	59	0	0	0	0
522373	Stenotrophomonas maltophilia K279a	Bacteria	no rank	57	0	0	0	57	0	0	0	0
359160	BEP clade	Eukaryota	no rank	53	0	0	0	0	0	53	0	0
553174	Prevotella melaninogenica ATCC 25845	Bacteria	no rank	52	0	0	0	0	0	0	24	28
649349	Leadbetterella byssophila DSM 17132	Bacteria	no rank	51	0	0	0	51	0	0	0	0
517418	Chloroherpeton thalassium ATCC 35110	Bacteria	no rank	50	0	0	0	0	0	0	12	38
405532	Bacillus cereus B4264	Bacteria	no rank	49	0	0	7	42	0	0	0	0
279808	Staphylococcus haemolyticus JCSC1435	Bacteria	no rank	48	0	0	41	0	0	0	7	0
716545	saccharomyceta	Eukaryota	no rank	47	0	0	0	0	0	0	23	24
265072	Methylobacillus flagellatus KT	Bacteria	no rank	46	46	0	0	0	0	0	0	0
264198	Ralstonia eutropha JMP134	Bacteria	no rank	45	0	0	0	0	0	0	0	45
167324	Human rhinovirus 46	Viruses	no rank	45	0	0	0	0	0	0	0	45
715962	dothideomyceta	Eukaryota	no rank	42	0	0	0	0	0	0	23	19
716546	leotiomyceta	Eukaryota	no rank	42	0	0	0	0	0	0	23	19
66692	Bacillus clausii KSM-K16	Bacteria	no rank	41	0	0	0	0	0	0	0	41
393595	Alcanivorax borkumensis SK2	Bacteria	no rank	41	0	0	41	0	0	0	0	0
33807	unclassified Alphaproteobacteria (miscellaneous)	Bacteria	no rank	40	0	0	0	0	0	0	0	40
82117	unclassified Alphaproteobacteria	Bacteria	no rank	40	0	0	0	0	0	0	0	40
313596	Robiginitalea biformata HTCC2501	Bacteria	no rank	40	0	0	34	6	0	0	0	0
471853	Beutenbergia cavernae DSM 12333	Bacteria	no rank	40	0	0	0	0	0	0	0	40
465515	Micrococcus luteus NCTC 2665	Bacteria	no rank	39	24	0	9	0	0	0	0	6
374931	Haemophilus influenzae PittGG	Bacteria	no rank	38	0	0	0	0	0	0	29	9
446462	Actinosynnema mirum DSM 43827	Bacteria	no rank	38	0	38	0	0	0	0	0	0
652103	Rhodopseudomonas palustris DX-1	Bacteria	no rank	38	0	0	0	0	0	0	0	38
316385	Escherichia coli str. K-12 substr. DH10B	Bacteria	no rank	36	0	0	36	0	0	0	0	0
935593	Neisseria meningitidis M04-240196	Bacteria	no rank	36	0	0	0	0	0	0	0	36
176280	Staphylococcus epidermidis ATCC 12228	Bacteria	no rank	35	15	20	0	0	0	0	0	0
668336	Aggregatibacter actinomycetemcomitans D11S-1	Bacteria	no rank	35	3	0	0	0	0	0	0	32
762903	Pedobacter saltans DSM 12145	Bacteria	no rank	32	0	0	0	0	0	32	0	0
319795	Deinococcus geothermalis DSM 11300	Bacteria	no rank	31	0	0	0	0	0	31	0	0
405531	Bacillus cereus G9842	Bacteria	no rank	31	0	0	6	25	0	0	0	0
57731	environmental samples	Eukaryota	no rank	31	0	0	0	0	0	0	0	31
521097	Capnocytophaga ochracea DSM 7271	Bacteria	no rank	30	0	0	0	0	0	0	30	0
33317	Protostomia	Eukaryota	no rank	30	0	0	0	0	0	0	30	0
83137	Sarcoptiformes	Eukaryota	no rank	30	0	0	0	0	0	0	30	0
88770	Panarthropoda	Eukaryota	no rank	30	0	0	0	0	0	0	30	0
91836	malvids	Eukaryota	no rank	30	0	30	0	0	0	0	0	0
460265	Methylobacterium nodulans ORS 2060	Bacteria	no rank	28	0	0	0	0	0	0	0	28
694427	Paludibacter propionicigenes WB4	Bacteria	no rank	28	0	0	14	14	0	0	0	0
234621	Rhodococcus erythropolis PR4	Bacteria	no rank	26	0	26	0	0	0	0	0	0
398511	Bacillus pseudofirmus OF4	Bacteria	no rank	25	0	0	0	0	0	0	25	0
648757	Rhodomicrobium vannielii ATCC 17100	Bacteria	no rank	25	0	0	0	0	0	0	25	0
226900	Bacillus cereus ATCC 14579	Bacteria	no rank	24	0	0	24	0	0	0	0	0
279238	Novosphingobium aromaticivorans DSM 12444	Bacteria	no rank	23	0	23	0	0	0	0	0	0
384676	Pseudomonas entomophila L48	Bacteria	no rank	23	23	0	0	0	0	0	0	0
643867	Marivirga tractuosa DSM 4126	Bacteria	no rank	22	6	0	11	0	0	5	0	0
47926	environmental samples	Bacteria	no rank	21	0	0	0	0	0	0	0	21
331111	Escherichia coli E24377A	Bacteria	no rank	21	0	0	21	0	0	0	0	0
349520	Paenibacillus polymyxa E681	Bacteria	no rank	21	0	0	0	0	0	0	0	21
471857	Saccharomonospora viridis DSM 43017	Bacteria	no rank	21	0	0	0	0	0	0	21	0
865938	Weeksella virosa DSM 16922	Bacteria	no rank	21	0	0	0	0	0	0	0	21
402882	Shewanella baltica OS185	Bacteria	no rank	20	0	0	0	20	0	0	0	0
981331	Acinetobacter calcoaceticus DSM 30006	Bacteria	no rank	20	0	0	0	0	0	0	0	20
50742	environmental samples	Bacteria	no rank	19	0	0	0	0	0	0	19	0
757424	Herbaspirillum seropedicae SmR1	Bacteria	no rank	19	0	19	0	0	0	0	0	0
1032488	Neisseria shayeganii 871	Bacteria	no rank	19	0	0	0	0	0	0	19	0
135058	environmental samples	Bacteria	no rank	18	0	0	0	0	0	0	18	0
452662	Sphingobium japonicum UT26S	Bacteria	no rank	18	0	18	0	0	0	0	0	0
306537	Corynebacterium jeikeium K411	Bacteria	no rank	17	0	0	0	0	0	0	0	17
196164	Corynebacterium efficiens YS-314	Bacteria	no rank	16	0	0	0	0	0	0	0	16
221988	Mannheimia succiniciproducens MBEL55E	Bacteria	no rank	16	0	0	0	0	0	0	0	16
391735	Verminephrobacter eiseniae EF01-2	Bacteria	no rank	16	0	16	0	0	0	0	0	0
42770	Human coxsackievirus A11	Viruses	no rank	16	0	0	0	0	0	0	0	16
269800	Thermobifida fusca YX	Bacteria	no rank	15	0	0	0	0	0	0	15	0
29339	Bacillus thuringiensis serovar kurstaki	Bacteria	no rank	14	14	0	0	0	0	0	0	0
323098	Nitrobacter winogradskyi Nb-255	Bacteria	no rank	14	0	0	0	0	0	0	0	14
714359	Bacillus thuringiensis BMB171	Bacteria	no rank	14	14	0	0	0	0	0	0	0
32036	sulfur-oxidizing symbionts	Bacteria	no rank	13	0	0	9	4	0	0	0	0
118884	unclassified Gammaproteobacteria	Bacteria	no rank	13	0	0	9	4	0	0	0	0
300267	Shigella dysenteriae Sd197	Bacteria	no rank	13	0	13	0	0	0	0	0	0
413404	Candidatus Ruthia magnifica str. Cm (Calyptogena magnifica)	Bacteria	no rank	13	0	0	9	4	0	0	0	0
485917	Pedobacter heparinus DSM 2366	Bacteria	no rank	13	5	8	0	0	0	0	0	0
508677	unclassified Synergistetes	Bacteria	no rank	13	0	0	0	0	0	0	13	0
579405	Dickeya dadantii Ech703	Bacteria	no rank	13	0	13	0	0	0	0	0	0
107630	unclassified Planctomycetales	Bacteria	no rank	12	0	0	0	0	0	0	0	12
243275	Treponema denticola ATCC 35405	Bacteria	no rank	12	0	0	0	0	0	0	12	0
399741	Serratia proteamaculans 568	Bacteria	no rank	12	0	12	0	0	0	0	0	0
479437	Eggerthella lenta DSM 2243	Bacteria	no rank	12	0	0	12	0	0	0	0	0
573061	Clostridium cellulovorans 743B	Bacteria	no rank	12	0	0	0	0	0	0	12	0
483216	Bacteroides eggerthii DSM 20697	Bacteria	no rank	11	0	0	0	0	0	0	11	0
523794	Leptotrichia buccalis C-1013-b	Bacteria	no rank	11	0	0	0	0	0	0	11	0
667015	Bacteroides salanitronis DSM 18170	Bacteria	no rank	11	0	0	0	0	0	0	11	0
247156	Nocardia farcinica IFM 10152	Bacteria	no rank	10	0	0	0	0	0	0	0	10
402612	Flavobacterium psychrophilum JIP02/86	Bacteria	no rank	10	10	0	0	0	0	0	0	0
5302	Agaricomycotina	Eukaryota	no rank	10	0	0	0	0	0	0	0	10
136265	environmental samples	Eukaryota	no rank	10	0	0	0	0	0	0	10	0
34035	unclassified Epsilonproteobacteria	Bacteria	no rank	9	0	0	0	0	0	0	0	9
272943	Rhodobacter sphaeroides 2.4.1	Bacteria	no rank	9	0	0	9	0	0	0	0	0
402881	Parvibaculum lavamentivorans DS-1	Bacteria	no rank	9	0	0	0	9	0	0	0	0
443218	Amycolicicoccus subflavus DQS3-9A1	Bacteria	no rank	9	0	0	0	0	0	0	9	0
644283	Micromonospora aurantiaca ATCC 27029	Bacteria	no rank	9	0	0	0	0	0	0	0	9
91888	lamiids	Eukaryota	no rank	9	0	0	0	0	0	0	0	9
182687	environmental samples	Bacteria	no rank	8	0	0	0	0	0	0	0	8
405948	Saccharopolyspora erythraea NRRL 2338	Bacteria	no rank	8	0	0	0	0	0	0	8	0
655815	Zunongwangia profunda SM-A87	Bacteria	no rank	8	2	0	0	6	0	0	0	0
662598	Neisseria meningitidis alpha14	Bacteria	no rank	8	0	0	0	0	0	0	0	8
698737	Staphylococcus lugdunensis HKU09-01	Bacteria	no rank	8	0	0	0	0	0	0	0	8
355688	Agaricomycetes incertae sedis	Eukaryota	no rank	8	0	0	0	0	0	0	0	8
80843	environmental samples	Bacteria	no rank	7	0	0	7	0	0	0	0	0
316401	Escherichia coli ETEC H10407	Bacteria	no rank	7	0	0	7	0	0	0	0	0
342610	Pseudoalteromonas atlantica T6c	Bacteria	no rank	7	0	0	0	7	0	0	0	0
350058	Mycobacterium vanbaalenii PYR-1	Bacteria	no rank	7	0	0	0	0	0	7	0	0
357348	Burkholderia pseudomallei 1106a	Bacteria	no rank	7	7	0	0	0	0	0	0	0
365659	Streptococcus mitis B6	Bacteria	no rank	7	0	0	0	0	7	0	0	0
398578	Delftia acidovorans SPH-1	Bacteria	no rank	7	0	0	0	7	0	0	0	0
977880	Cupriavidus taiwanensis LMG 19424	Bacteria	no rank	7	0	0	0	0	0	0	0	7
992406	Riemerella anatipestifer RA-GD	Bacteria	no rank	7	7	0	0	0	0	0	0	0
81426	unclassified Bradyrhizobiaceae	Bacteria	no rank	6	0	0	0	0	0	0	0	6
90153	Chromobacterium group	Bacteria	no rank	6	0	0	0	6	0	0	0	0
167971	environmental samples	Bacteria	no rank	6	0	0	0	0	0	0	0	6
243365	Chromobacterium violaceum ATCC 12472	Bacteria	no rank	6	0	0	0	6	0	0	0	0
269798	Cytophaga hutchinsonii ATCC 33406	Bacteria	no rank	6	0	0	0	6	0	0	0	0
290339	Cronobacter sakazakii ATCC BAA-894	Bacteria	no rank	6	0	0	0	0	0	6	0	0
311403	Agrobacterium radiobacter K84	Bacteria	no rank	6	0	0	0	0	0	6	0	0
340322	Corynebacterium glutamicum R	Bacteria	no rank	6	0	0	0	0	0	0	0	6
412694	Bacillus thuringiensis str. Al Hakam	Bacteria	no rank	6	0	0	0	0	0	0	0	6
859656	Ralstonia solanacearum CFBP2957	Bacteria	no rank	6	0	6	0	0	0	0	0	0
44136	Human rhinovirus 7	Viruses	no rank	6	0	0	0	0	0	0	6	0
182689	environmental samples	Bacteria	no rank	5	0	0	0	0	0	0	5	0
207559	Desulfovibrio desulfuricans subsp. desulfuricans str. G20	Bacteria	no rank	5	0	0	0	5	0	0	0	0
240292	Anabaena variabilis ATCC 29413	Bacteria	no rank	5	0	0	5	0	0	0	0	0
386415	Clostridium novyi NT	Bacteria	no rank	5	0	0	0	5	0	0	0	0
479435	Kribbella flavida DSM 17836	Bacteria	no rank	5	5	0	0	0	0	0	0	0
118267	mitosporic Saccharomycetales	Eukaryota	no rank	5	0	0	0	0	0	0	0	5
196894	unclassified Siphoviridae	Viruses	no rank	5	0	0	0	0	5	0	0	0
439292	Bacillus selenitireducens MLS10	Bacteria	no rank	4	0	0	0	0	0	0	0	4
690566	Sphingobium chlorophenolicum L-1	Bacteria	no rank	4	4	0	0	0	0	0	0	0
693974	Shewanella baltica BA175	Bacteria	no rank	4	0	4	0	0	0	0	0	0
762376	Achromobacter xylosoxidans A8	Bacteria	no rank	4	0	0	0	4	0	0	0	0
2323	unclassified Bacteria	Bacteria	no rank	3	0	3	0	0	0	0	0	0
49928	unclassified Bacteria (miscellaneous)	Bacteria	no rank	3	0	3	0	0	0	0	0	0
639283	Starkeya novella DSM 506	Bacteria	no rank	2	0	0	0	0	0	0	2	0
33208	Metazoa	Eukaryota	kingdom	4451	253	901	178	1014	222	107	1458	318
33090	Viridiplantae	Eukaryota	kingdom	857	193	575	0	21	0	53	0	15
4751	Fungi	Eukaryota	kingdom	124	0	0	0	0	0	0	50	74
314293	Simiiformes	Eukaryota	infraorder	3414	253	901	178	1014	222	107	497	242
12059	Enterovirus	Viruses	genus	12503	0	0	0	0	0	0	6886	5617
1578	Lactobacillus	Bacteria	genus	11395	239	2161	20	3578	0	5397	0	0
194	Campylobacter	Bacteria	genus	9262	0	0	7625	0	0	0	560	1077
1386	Bacillus	Bacteria	genus	7321	3964	10	1030	2231	0	0	35	51
482	Neisseria	Bacteria	genus	7100	0	0	0	0	0	0	3753	3347
1279	Staphylococcus	Bacteria	genus	6076	33	20	41	5380	0	204	102	296
48736	Ralstonia	Bacteria	genus	4609	503	580	116	26	0	3355	29	0
79328	Chitinophaga	Bacteria	genus	4213	37	9	591	3576	0	0	0	0
620	Shigella	Bacteria	genus	4097	929	13	13	3142	0	0	0	0
724	Haemophilus	Bacteria	genus	4000	0	0	0	0	0	0	1320	2680
1269	Micrococcus	Bacteria	genus	3467	97	218	1234	78	1567	267	0	6
561	Escherichia	Bacteria	genus	3301	720	0	1263	0	1318	0	0	0
9605	Homo	Eukaryota	genus	2911	253	788	173	870	222	107	263	235
1301	Streptococcus	Bacteria	genus	2578	0	7	0	0	7	0	583	1981
613	Serratia	Bacteria	genus	2062	0	21	0	0	2018	0	23	0
445	Legionella	Bacteria	genus	1973	0	0	0	1973	0	0	0	0
469	Acinetobacter	Bacteria	genus	1795	0	0	0	533	0	1235	0	27
407	Methylobacterium	Bacteria	genus	1729	48	0	0	129	0	1112	0	440
33882	Microbacterium	Bacteria	genus	1562	0	0	0	0	0	1562	0	0
32207	Rothia	Bacteria	genus	1545	0	0	0	0	0	0	260	1285
475	Moraxella	Bacteria	genus	1442	0	0	0	12	0	0	585	845
12916	Acidovorax	Bacteria	genus	1279	0	0	1194	12	6	32	0	35
286	Pseudomonas	Bacteria	genus	1141	348	370	0	0	0	353	0	70
713	Actinobacillus	Bacteria	genus	1067	0	0	0	0	0	0	457	610
32008	Burkholderia	Bacteria	genus	1029	148	66	11	500	66	238	0	0
34072	Variovorax	Bacteria	genus	788	0	155	0	0	0	633	0	0
497	Psychrobacter	Bacteria	genus	783	427	0	25	268	0	29	11	23
1350	Enterococcus	Bacteria	genus	764	0	0	0	0	0	0	314	450
848	Fusobacterium	Bacteria	genus	740	0	0	0	0	0	0	586	154
1716	Corynebacterium	Bacteria	genus	717	0	0	0	0	0	0	525	192
53246	Pseudoalteromonas	Bacteria	genus	662	0	0	655	7	0	0	0	0
68287	Mesorhizobium	Bacteria	genus	546	55	187	51	10	0	157	0	86
10088	Mus	Eukaryota	genus	503	0	0	0	0	0	0	503	0
3337	Pinus	Eukaryota	genus	486	185	301	0	0	0	0	0	0
1654	Actinomyces	Bacteria	genus	459	0	0	0	0	0	0	94	365
416916	Aggregatibacter	Bacteria	genus	440	3	0	0	0	0	0	405	32
237	Flavobacterium	Bacteria	genus	368	16	3	0	0	0	349	0	0
29465	Veillonella	Bacteria	genus	353	0	0	0	0	0	0	142	211
22	Shewanella	Bacteria	genus	346	0	4	322	20	0	0	0	0
75	Caulobacter	Bacteria	genus	259	0	0	0	0	0	0	29	230
165697	Sphingopyxis	Bacteria	genus	247	152	65	0	0	0	0	0	30
33981	Kineococcus	Bacteria	genus	224	0	0	0	0	0	0	0	224
13687	Sphingomonas	Bacteria	genus	218	0	167	0	21	0	22	0	8
305976	Pusillimonas	Bacteria	genus	212	0	0	0	212	0	0	0	0
110932	Leifsonia	Bacteria	genus	200	0	191	0	0	0	9	0	0
120831	Dyadobacter	Bacteria	genus	183	0	175	8	0	0	0	0	0
776	Coxiella	Bacteria	genus	174	0	0	0	174	0	0	0	0
106589	Cupriavidus	Bacteria	genus	172	9	0	0	0	0	0	3	160
107	Spirosoma	Bacteria	genus	164	0	0	0	0	0	164	0	0
69965	Macrococcus	Bacteria	genus	158	0	0	0	0	0	0	57	101
970	Selenomonas	Bacteria	genus	148	0	0	0	0	0	0	9	139
32257	Kingella	Bacteria	genus	148	0	0	0	0	0	0	111	37
73029	Dechloromonas	Bacteria	genus	147	0	0	0	0	0	147	0	0
3319	Abies	Eukaryota	genus	133	0	133	0	0	0	0	0	0
838	Prevotella	Bacteria	genus	132	0	0	0	80	0	0	24	28
2349	Haliscomenobacter	Bacteria	genus	124	7	0	82	35	0	0	0	0
1763	Mycobacterium	Bacteria	genus	121	2	0	9	0	0	78	32	0
81	Hyphomicrobium	Bacteria	genus	118	0	28	0	0	0	0	5	85
234	Brucella	Bacteria	genus	118	0	0	0	0	0	118	0	0
34084	Riemerella	Bacteria	genus	113	85	23	5	0	0	0	0	0
332102	Fluviicola	Bacteria	genus	110	6	8	96	0	0	0	0	0
120652	Methylocella	Bacteria	genus	108	0	108	0	0	0	0	0	0
374	Bradyrhizobium	Bacteria	genus	105	6	70	0	0	10	0	0	19
28263	Arcanobacterium	Bacteria	genus	101	0	0	0	0	0	0	30	71
165696	Novosphingobium	Bacteria	genus	98	0	23	0	0	0	0	0	75
3746	Fragaria	Eukaryota	genus	93	0	93	0	0	0	0	0	0
1111	Porphyrobacter	Bacteria	genus	91	0	0	0	0	0	0	0	91
1041	Erythrobacter	Bacteria	genus	87	0	0	0	0	0	0	0	87
333922	Betapapillomavirus	Viruses	genus	76	76	0	0	0	0	0	0	0
117563	Granulicatella	Bacteria	genus	70	0	0	0	0	0	0	0	70
28105	Sinorhizobium	Bacteria	genus	68	0	68	0	0	0	0	0	0
40323	Stenotrophomonas	Bacteria	genus	68	0	0	0	57	0	0	0	11
32199	Buchnera	Bacteria	genus	66	66	0	0	0	0	0	0	0
214906	Histophilus	Bacteria	genus	59	0	0	0	59	0	0	0	0
745	Pasteurella	Bacteria	genus	56	0	0	0	0	0	0	56	0
379	Rhizobium	Bacteria	genus	54	0	0	0	0	0	0	5	49
4564	Triticum	Eukaryota	genus	53	0	0	0	0	0	53	0	0
44249	Paenibacillus	Bacteria	genus	51	0	0	0	0	0	0	0	51
319458	Leadbetterella	Bacteria	genus	51	0	0	0	51	0	0	0	0
100715	Chloroherpeton	Bacteria	genus	50	0	0	0	0	0	0	12	38
404	Methylobacillus	Bacteria	genus	46	46	0	0	0	0	0	0	0
84567	Pedobacter	Bacteria	genus	45	5	8	0	0	0	32	0	0
165695	Sphingobium	Bacteria	genus	45	4	18	0	0	0	0	6	17
1016	Capnocytophaga	Bacteria	genus	44	0	0	0	0	0	0	44	0
1663	Arthrobacter	Bacteria	genus	43	0	0	0	43	0	0	0	0
59753	Alcanivorax	Bacteria	genus	41	0	0	41	0	0	0	0	0
84756	Beutenbergia	Bacteria	genus	40	0	0	0	0	0	0	0	40
252306	Robiginitalea	Bacteria	genus	40	0	0	34	6	0	0	0	0
1073	Rhodopseudomonas	Bacteria	genus	38	0	0	0	0	0	0	0	38
40566	Actinosynnema	Bacteria	genus	38	0	38	0	0	0	0	0	0
1485	Clostridium	Bacteria	genus	32	0	0	0	5	0	0	12	15
1573	Clavibacter	Bacteria	genus	32	0	0	0	0	0	0	0	32
687332	Betatorquevirus	Viruses	genus	32	0	0	0	0	32	0	0	0
1298	Deinococcus	Bacteria	genus	31	0	0	0	0	0	31	0	0
3648	Carica	Eukaryota	genus	30	0	30	0	0	0	0	0	0
32067	Leptotrichia	Bacteria	genus	29	0	0	0	0	0	0	29	0
1854	Frankia	Bacteria	genus	28	0	0	0	0	0	0	28	0
346096	Paludibacter	Bacteria	genus	28	0	0	14	14	0	0	0	0
1827	Rhodococcus	Bacteria	genus	26	0	26	0	0	0	0	0	0
2747	Carnobacterium	Bacteria	genus	26	0	0	0	0	0	0	26	0
1068	Rhodomicrobium	Bacteria	genus	25	0	0	0	0	0	0	25	0
816	Bacteroides	Bacteria	genus	22	0	0	0	0	0	0	22	0
869806	Marivirga	Bacteria	genus	22	6	0	11	0	0	5	0	0
1013	Weeksella	Bacteria	genus	21	0	0	0	0	0	0	0	21
1851	Saccharomonospora	Bacteria	genus	21	0	0	0	0	0	0	21	0
3066	Volvox	Eukaryota	genus	21	0	0	0	21	0	0	0	0
157	Treponema	Bacteria	genus	19	0	0	0	0	0	0	12	7
963	Herbaspirillum	Bacteria	genus	19	0	19	0	0	0	0	0	0
46255	Weissella	Bacteria	genus	19	0	0	0	0	0	0	0	19
9596	Pan	Eukaryota	genus	19	0	19	0	0	0	0	0	0
3325	Larix	Eukaryota	genus	18	0	18	0	0	0	0	0	0
33042	Coprococcus	Bacteria	genus	16	0	0	0	0	0	0	16	0
364316	Verminephrobacter	Bacteria	genus	16	0	16	0	0	0	0	0	0
697331	Basfia	Bacteria	genus	16	0	0	0	0	0	0	0	16
83677	Thermobifida	Bacteria	genus	15	0	0	0	0	0	0	15	0
911	Nitrobacter	Bacteria	genus	14	0	0	0	0	0	0	0	14
1839	Nocardioides	Bacteria	genus	14	0	0	0	0	0	0	0	14
308865	Elizabethkingia	Bacteria	genus	14	14	0	0	0	0	0	0	0
204037	Dickeya	Bacteria	genus	13	0	13	0	0	0	0	0	0
308112	Krokinobacter	Bacteria	genus	13	13	0	0	0	0	0	0	0
10114	Rattus	Eukaryota	genus	13	0	0	0	0	0	0	13	0
1129	Synechococcus	Bacteria	genus	12	0	0	12	0	0	0	0	0
28453	Sphingobacterium	Bacteria	genus	12	4	0	0	0	0	0	0	8
59732	Chryseobacterium	Bacteria	genus	12	12	0	0	0	0	0	0	0
84111	Eggerthella	Bacteria	genus	12	0	0	12	0	0	0	0	0
380240	Candidatus Brocadia	Bacteria	genus	12	0	0	0	0	0	0	0	12
29580	Janthinobacterium	Bacteria	genus	11	0	11	0	0	0	0	0	0
303379	Herminiimonas	Bacteria	genus	11	0	11	0	0	0	0	0	0
1817	Nocardia	Bacteria	genus	10	0	0	0	0	0	0	0	10
449972	Chelativorans	Bacteria	genus	10	0	10	0	0	0	0	0	0
222	Achromobacter	Bacteria	genus	9	0	0	0	4	0	0	5	0
1060	Rhodobacter	Bacteria	genus	9	0	0	9	0	0	0	0	0
1253	Pediococcus	Bacteria	genus	9	0	0	0	0	0	0	0	9
1873	Micromonospora	Bacteria	genus	9	0	0	0	0	0	0	0	9
129337	Geobacillus	Bacteria	genus	9	0	0	0	0	0	0	0	9
256616	Parvibaculum	Bacteria	genus	9	0	0	0	9	0	0	0	0
269258	Nitratiruptor	Bacteria	genus	9	0	0	0	0	0	0	0	9
992401	Amycolicicoccus	Bacteria	genus	9	0	0	0	0	0	0	9	0
39251	Paulownia	Eukaryota	genus	9	0	0	0	0	0	0	0	9
1234	Nitrospira	Bacteria	genus	8	0	0	0	8	0	0	0	0
1835	Saccharopolyspora	Bacteria	genus	8	0	0	0	0	0	0	8	0
2093	Mycoplasma	Bacteria	genus	8	0	0	0	0	0	0	8	0
59735	Bergeyella	Bacteria	genus	8	0	0	0	0	0	0	0	8
417127	Zunongwangia	Bacteria	genus	8	2	0	0	6	0	0	0	0
3681	Begonia	Eukaryota	genus	8	8	0	0	0	0	0	0	0
237557	Davidiella	Eukaryota	genus	8	0	0	0	0	0	0	0	8
546344	Acantholichen	Eukaryota	genus	8	0	0	0	0	0	0	0	8
80865	Delftia	Bacteria	genus	7	0	0	0	7	0	0	0	0
357	Agrobacterium	Bacteria	genus	6	0	0	0	0	0	6	0	0
535	Chromobacterium	Bacteria	genus	6	0	0	0	6	0	0	0	0
978	Cytophaga	Bacteria	genus	6	0	0	0	6	0	0	0	0
1243	Leuconostoc	Bacteria	genus	6	0	0	0	0	0	0	0	6
43988	Cyanothece	Bacteria	genus	6	0	0	0	0	0	0	0	6
413496	Cronobacter	Bacteria	genus	6	0	0	0	0	0	6	0	0
41443	Tyrophagus	Eukaryota	genus	6	0	0	0	0	0	0	6	0
93812	Chimaphila	Eukaryota	genus	6	0	0	0	0	0	0	0	6
150114	Rhizoglyphus	Eukaryota	genus	6	0	0	0	0	0	0	6	0
872	Desulfovibrio	Bacteria	genus	5	0	0	0	5	0	0	0	0
1163	Anabaena	Bacteria	genus	5	0	0	5	0	0	0	0	0
182639	Kribbella	Bacteria	genus	5	5	0	0	0	0	0	0	0
291183	Lacinutrix	Bacteria	genus	5	0	0	0	5	0	0	0	0
5475	Candida	Eukaryota	genus	5	0	0	0	0	0	0	0	5
152053	Starkeya	Bacteria	genus	2	0	0	0	0	0	0	2	0
3068	Volvox carteri f. nagariensis	Eukaryota	forma	21	0	0	0	21	0	0	0	0
687329	Anelloviridae	Viruses	family	16064	5711	0	22	0	10331	0	0	0
12058	Picornaviridae	Viruses	family	12503	0	0	0	0	0	0	6886	5617
33958	Lactobacillaceae	Bacteria	family	11404	239	2161	20	3578	0	5397	0	9
543	Enterobacteriaceae	Bacteria	family	9949	1786	268	1377	3142	3336	6	34	0
72294	Campylobacteraceae	Bacteria	family	9262	0	0	7625	0	0	0	560	1077
481	Neisseriaceae	Bacteria	family	7394	0	0	0	6	0	0	4004	3384
186817	Bacillaceae	Bacteria	family	7330	3964	10	1030	2231	0	0	35	60
712	Pasteurellaceae	Bacteria	family	6558	3	0	0	59	0	0	2813	3683
90964	Staphylococcaceae	Bacteria	family	6234	33	20	41	5380	0	204	159	397
119060	Burkholderiaceae	Bacteria	family	5830	660	646	127	526	66	3593	52	160
1268	Micrococcaceae	Bacteria	family	5055	97	218	1234	121	1567	267	260	1291
468	Moraxellaceae	Bacteria	family	4020	427	0	25	813	0	1264	596	895
9604	Hominidae	Eukaryota	family	3410	253	897	178	1014	222	107	497	242
1300	Streptococcaceae	Bacteria	family	2779	0	7	0	0	7	0	583	2182
80864	Comamonadaceae	Bacteria	family	2090	0	171	1194	19	6	665	0	35
444	Legionellaceae	Bacteria	family	1973	0	0	0	1973	0	0	0	0
85023	Microbacteriaceae	Bacteria	family	1794	0	191	0	0	0	1571	0	32
119045	Methylobacteriaceae	Bacteria	family	1729	48	0	0	129	0	1112	0	440
135621	Pseudomonadaceae	Bacteria	family	1141	348	370	0	0	0	353	0	70
151340	Papillomaviridae	Viruses	family	1090	76	443	0	0	571	0	0	0
203492	Fusobacteriaceae	Bacteria	family	806	0	0	0	0	0	0	652	154
81852	Enterococcaceae	Bacteria	family	788	0	0	0	0	0	0	314	474
49546	Flavobacteriaceae	Bacteria	family	781	205	46	74	34	0	349	44	29
5799	Eimeriidae	Eukaryota	family	738	0	0	738	0	0	0	0	0
1653	Corynebacteriaceae	Bacteria	family	717	0	0	0	0	0	0	525	192
267888	Pseudoalteromonadaceae	Bacteria	family	662	0	0	655	7	0	0	0	0
3318	Pinaceae	Eukaryota	family	637	185	452	0	0	0	0	0	0
2049	Actinomycetaceae	Bacteria	family	624	0	0	0	0	0	0	124	500
41297	Sphingomonadaceae	Bacteria	family	611	156	276	0	21	0	22	6	130
69277	Phyllobacteriaceae	Bacteria	family	565	55	197	51	19	0	157	0	86
10066	Muridae	Eukaryota	family	516	0	0	0	0	0	0	516	0
31977	Veillonellaceae	Bacteria	family	501	0	0	0	0	0	0	151	350
1162	Nostocaceae	Bacteria	family	425	0	0	5	420	0	0	0	0
89373	Cytophagaceae	Bacteria	family	404	0	175	8	57	0	164	0	0
267890	Shewanellaceae	Bacteria	family	346	0	4	322	20	0	0	0	0
76892	Caulobacteraceae	Bacteria	family	259	0	0	0	0	0	0	29	230
83778	Kineosporiaceae	Bacteria	family	224	0	0	0	0	0	0	0	224
506	Alcaligenaceae	Bacteria	family	221	0	0	0	216	0	0	5	0
41294	Bradyrhizobiaceae	Bacteria	family	210	6	117	0	0	10	0	0	77
335929	Erythrobacteraceae	Bacteria	family	178	0	0	0	0	0	0	0	178
118968	Coxiellaceae	Bacteria	family	174	0	0	0	174	0	0	0	0
39724	Circoviridae	Viruses	family	168	0	0	168	0	0	0	0	0
75787	Rhodocyclaceae	Bacteria	family	147	0	0	0	0	0	147	0	0
45401	Hyphomicrobiaceae	Bacteria	family	143	0	28	0	0	0	0	30	85
171552	Prevotellaceae	Bacteria	family	132	0	0	0	80	0	0	24	28
1762	Mycobacteriaceae	Bacteria	family	130	2	0	9	0	0	78	41	0
82115	Rhizobiaceae	Bacteria	family	128	0	68	0	0	0	6	5	49
89374	Saprospiraceae	Bacteria	family	124	7	0	82	35	0	0	0	0
118882	Brucellaceae	Bacteria	family	118	0	0	0	0	0	118	0	0
246874	Cryomorphaceae	Bacteria	family	110	6	8	96	0	0	0	0	0
45404	Beijerinckiaceae	Bacteria	family	108	0	108	0	0	0	0	0	0
186828	Carnobacteriaceae	Bacteria	family	96	0	0	0	0	0	0	26	70
3745	Rosaceae	Eukaryota	family	93	0	93	0	0	0	0	0	0
32033	Xanthomonadaceae	Bacteria	family	68	0	0	0	57	0	0	0	11
84566	Sphingobacteriaceae	Bacteria	family	57	9	8	0	0	0	32	0	8
4479	Poaceae	Eukaryota	family	53	0	0	0	0	0	53	0	0
186822	Paenibacillaceae	Bacteria	family	51	0	0	0	0	0	0	0	51
191412	Chlorobiaceae	Bacteria	family	50	0	0	0	0	0	0	12	38
32011	Methylophilaceae	Bacteria	family	46	46	0	0	0	0	0	0	0
75682	Oxalobacteraceae	Bacteria	family	41	0	41	0	0	0	0	0	0
224372	Alcanivoracaceae	Bacteria	family	41	0	0	41	0	0	0	0	0
125316	Beutenbergiaceae	Bacteria	family	40	0	0	0	0	0	0	0	40
103957	Actinosynnemataceae	Bacteria	family	38	0	38	0	0	0	0	0	0
85025	Nocardiaceae	Bacteria	family	36	0	26	0	0	0	0	0	10
31979	Clostridiaceae	Bacteria	family	32	0	0	0	5	0	0	12	15
183710	Deinococcaceae	Bacteria	family	31	0	0	0	0	0	31	0	0
3647	Caricaceae	Eukaryota	family	30	0	30	0	0	0	0	0	0
2070	Pseudonocardiaceae	Bacteria	family	29	0	0	0	0	0	0	29	0
74712	Frankiaceae	Bacteria	family	28	0	0	0	0	0	0	28	0
171551	Porphyromonadaceae	Bacteria	family	28	0	0	14	14	0	0	0	0
81850	Leuconostocaceae	Bacteria	family	25	0	0	0	0	0	0	0	25
93133	Mycosphaerellaceae	Eukaryota	family	23	0	0	0	0	0	0	23	0
815	Bacteroidaceae	Bacteria	family	22	0	0	0	0	0	0	22	0
200667	Flammeovirgaceae	Bacteria	family	22	6	0	11	0	0	5	0	0
41442	Acaridae	Eukaryota	family	22	0	0	0	0	0	0	22	0
3065	Volvocaceae	Eukaryota	family	21	0	0	0	21	0	0	0	0
137	Spirochaetaceae	Bacteria	family	19	0	0	0	0	0	0	12	7
85015	Nocardioidaceae	Bacteria	family	19	5	0	0	0	0	0	0	14
452563	Davidiellaceae	Eukaryota	family	19	0	0	0	0	0	0	0	19
186803	Lachnospiraceae	Bacteria	family	16	0	0	0	0	0	0	16	0
83676	Nocardiopsaceae	Bacteria	family	15	0	0	0	0	0	0	15	0
28056	Micromonosporaceae	Bacteria	family	12	0	0	0	0	0	0	0	12
84107	Coriobacteriaceae	Bacteria	family	12	0	0	12	0	0	0	0	0
31989	Rhodobacteraceae	Bacteria	family	9	0	0	9	0	0	0	0	0
155891	Paulowniaceae	Eukaryota	family	9	0	0	0	0	0	0	0	9
2092	Mycoplasmataceae	Bacteria	family	8	0	0	0	0	0	0	8	0
189779	Nitrospiraceae	Bacteria	family	8	0	0	0	8	0	0	0	0
3680	Begoniaceae	Eukaryota	family	8	8	0	0	0	0	0	0	0
5304	Corticiaceae	Eukaryota	family	8	0	0	0	0	0	0	0	8
4345	Ericaceae	Eukaryota	family	6	0	0	0	0	0	0	0	6
194924	Desulfovibrionaceae	Bacteria	family	5	0	0	0	5	0	0	0	0
10699	Siphoviridae	Viruses	family	5	0	0	0	0	5	0	0	0
335928	Xanthobacteraceae	Bacteria	family	2	0	0	0	0	0	0	2	0
91061	Bacilli	Bacteria	class	29911	4236	2198	1091	12304	7	5601	1206	3268
1236	Gammaproteobacteria	Bacteria	class	25197	2564	642	2429	6249	3336	1623	3443	4911
28216	Betaproteobacteria	Bacteria	class	15790	706	858	1321	767	72	4405	4061	3600
29547	Epsilonproteobacteria	Bacteria	class	9271	0	0	7625	0	0	0	560	1086
1760	Actinobacteria (class)	Bacteria	class	9041	104	473	1255	121	1567	2171	1035	2315
117747	Sphingobacteria	Bacteria	class	4415	53	17	694	3611	0	32	0	8
28211	Alphaproteobacteria	Bacteria	class	4206	265	794	60	169	10	1415	77	1416
40674	Mammalia	Eukaryota	class	4195	253	901	178	1014	222	107	1233	287
117743	Flavobacteria	Bacteria	class	910	211	54	177	34	0	349	44	41
203490	Fusobacteria (class)	Bacteria	class	806	0	0	0	0	0	0	652	154
5796	Coccidia	Eukaryota	class	738	0	0	738	0	0	0	0	0
58019	Coniferopsida	Eukaryota	class	637	185	452	0	0	0	0	0	0
909932	Negativicutes	Bacteria	class	501	0	0	0	0	0	0	151	350
768503	Cytophagia	Bacteria	class	426	6	175	19	57	0	169	0	0
200643	Bacteroidia	Bacteria	class	182	0	0	14	94	0	0	46	28
4447	Liliopsida	Eukaryota	class	53	0	0	0	0	0	53	0	0
191410	Chlorobia	Bacteria	class	50	0	0	0	0	0	0	12	38
186801	Clostridia	Bacteria	class	48	0	0	0	5	0	0	28	15
147541	Dothideomycetes	Eukaryota	class	42	0	0	0	0	0	0	23	19
188787	Deinococci	Bacteria	class	31	0	0	0	0	0	31	0	0
6854	Arachnida	Eukaryota	class	30	0	0	0	0	0	0	30	0
3166	Chlorophyceae	Eukaryota	class	21	0	0	0	21	0	0	0	0
203692	Spirochaetes (class)	Bacteria	class	19	0	0	0	0	0	0	12	7
203683	Planctomycetacia	Bacteria	class	12	0	0	0	0	0	0	0	12
155619	Agaricomycetes	Eukaryota	class	10	0	0	0	0	0	0	0	10
31969	Mollicutes	Bacteria	class	8	0	0	0	0	0	0	8	0
203693	Nitrospira (class)	Bacteria	class	8	0	0	0	8	0	0	0	0
28221	Deltaproteobacteria	Bacteria	class	5	0	0	0	5	0	0	0	0
4891	Saccharomycetes	Eukaryota	class	5	0	0	0	0	0	0	0	5
